# Supplementary material
Source: publisher figshare collection journal article supplement (https://acs.figshare.com/ndownloader/files/16413968)
Supplement: Supplementary file 1 [file 16413968]

# Nitrosonium Reactivity of (NHC)Copper(I) Sulfide Complexes

Abraham J. Jordan<sup>†</sup>, Rebecca K. Walde<sup>†</sup>, Kelly M. Schultz<sup>‡</sup>, John Bacsa<sup>†§</sup>, Joseph P. Sadighi<sup>†\*</sup>

<sup>†</sup> School of Chemistry and Biochemistry, Georgia Institute of Technology, Atlanta, Georgia 30332-0400, United States

<sup>‡</sup> Department of Chemistry, Murdock Hall, Linfield College, McMinnville, OR 97128, United States

<sup>§</sup> X-ray Crystallography Center, Department of Chemistry, Emory University, 1515 Dickey Drive, Atlanta, Georgia 30322, United States

[joseph.sadighi@chemistry.gatech.edu](mailto:joseph.sadighi@chemistry.gatech.edu)

## *Supporting Information*

### **Contents**

|                                                   |     |
|---------------------------------------------------|-----|
| General Considerations                            | S2  |
| Spectroscopic Measurements                        | S3  |
| Elemental Analyses                                | S3  |
| Experimental Procedures                           | S4  |
| Deprotonation of <b>2</b>                         | S14 |
| Conversion of <b>4</b> to <b>1</b>                | S17 |
| Nitrosonium reactivity of <b>2</b>                | S18 |
| Nitrosonium reactivity of <b>1</b>                | S21 |
| Nitrosonium reactivity of <b>4</b>                | S25 |
| Generation of 7DippCuBF <sub>4</sub>              | S27 |
| Nitrosonium Reactivity of (7DippCuH) <sub>2</sub> | S30 |
| X-Ray Diffraction Studies                         | S31 |
| References                                        | S42 |

**General Considerations.** Unless otherwise indicated, manipulations were performed in an MBraun glovebox under an inert atmosphere of nitrogen, or in sealable glassware on a Schlenk line under an atmosphere of argon. Glassware and magnetic stir bars were dried in a ventilated oven at 160°C and were allowed to cool under vacuum. Dichloromethane (BDH), hexane (EMD Millipore Omnisolv), tetrahydrofuran (THF, EMD Millipore Omnisolv), toluene (EMD Millipore Omnisolv) were sparged with ultra-high purity argon (NexAir) for 30 minutes prior to first use, dried using an MBraun solvent purification system, transferred to Straus flasks, degassed using three freeze-pump-thaw cycles, and stored under nitrogen or argon. Anhydrous benzene (C<sub>6</sub>H<sub>6</sub>, EMD Millipore Drisolv) and, anhydrous pentane (EMD Millipore Drisolv, sealed under a nitrogen atmosphere) were used as received and stored in a glovebox. Tap water was purified in a Barnstead International automated still prior to use.

Benzene-*d*<sub>6</sub> (Cambridge Isotope Laboratories) was dried over sodium benzophenone ketyl, vacuum-transferred into oven-dried resealable flasks, and degassed by successive freeze-pump-thaw cycles. Dichloromethane-*d*<sub>2</sub> (Cambridge Isotope Laboratories) and acetonitrile-*d*<sub>3</sub> (Cambridge Isotope Laboratories) were dried over calcium hydride overnight, vacuum-transferred to an oven-dried resealable Schlenk flask, and degassed by successive freeze-pump-thaw cycles. Chloroform-*d* (Cambridge Isotope Laboratories) was used as received.

Sodium *tert*-butoxide (TCI America), copper(I) chloride (Alfa-Aesar), 2,6-diisopropylaniline (Sigma-Aldrich), *N,N*-diisopropylethylamine (Alfa-Aesar), acetic acid, (Alfa-Aesar), sodium metal (Alfa-Aesar), benzophenone (Alfa-Aesar), calcium hydride (Alfa-Aesar), 1,4-dibromobutane (Sigma-Aldrich), triethyl orthoformate (Alfa-Aesar), sodium sulfide (Alfa-Aesar), potassium hydrosulfide (Strem), 2-phenylacetic dithioperoxyanhydride (Matrix), *tert*-butyl nitrite (Sigma-Aldrich) sodium bis(trimethylsilyl)amide (NaHMDS, Sigma-Aldrich or Strem

Chemicals), nitrosonium tetrafluoroborate ( $\text{NO}^+ \text{BF}_4^-$ , Alfa-Aesar), silver tetrafluoroborate (Alfa-Aesar), nitrogen (NexAir), and argon (both industrial and ultra-high purity grades, NexAir) were used as received.  $7\text{DippCuCl}$ ,  $7\text{DippCuOtBu}$  (**3**),<sup>1</sup> and  $(7\text{DippCuH})_2$ <sup>1</sup> were prepared according to literature protocols and were characterized by  $^1\text{H}$  NMR spectroscopy.

**Spectroscopic Measurements.**  $^1\text{H}$ ,  $^{13}\text{C}$ ,  $^{11}\text{B}$ ,  $^{19}\text{F}$ , and  $^{31}\text{P}$  spectra were obtained using Bruker Avance IIIHD 700 MHz, Bruker DSX 400 MHz and Varian Vx 400 MHz spectrometers.  $^1\text{H}$  and  $^{13}\text{C}$  NMR chemical shifts are referenced with respect to solvent signals and reported relative to tetramethylsilane. A capillary insert of  $\alpha,\alpha,\alpha$ -trifluorotoluene (-63.72 ppm) was used to determine  $^{19}\text{F}$  NMR chemical shifts.  $^{31}\text{P}$  NMR chemical shifts were externally referenced to 85%  $\text{H}_3\text{PO}_4$  (0.0 ppm).

Infrared spectra were collected using microcrystalline samples on a Bruker Alpha-P infrared spectrometer equipped with an attenuated total reflection (ATR) attachment. Samples were exposed to air as briefly as possible prior to data collection.

**Elemental analyses** were performed by Atlantic Microlab, Inc. in Norcross, Georgia.

## Experimental Procedures

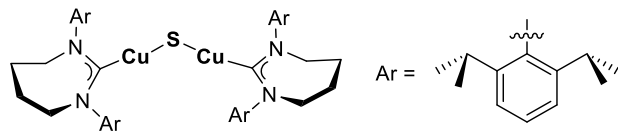

**(7DippCu)<sub>2</sub>S (1)** 7DippCuCl (0.182 g, 0.352 mmol) and sodium sulfide (0.055 g, 0.70 mmol) were combined in a 20-mL vial, equipped with a stir bar, before THF (5 mL) was added. The mixture was allowed to stir for 24h before the THF was removed *in vacuo*. The product was extracted with C<sub>6</sub>H<sub>6</sub> (3 x 3 mL) filtered through Celite and concentrated *in vacuo*. The resulting yellow solid was washed with CH<sub>3</sub>CN (2 x 3 mL), then dried *in vacuo* to afford the title complex as a yellow solid. (0.137 g, 78% yield) <sup>1</sup>H NMR (700 MHz, C<sub>6</sub>D<sub>6</sub>): δ (ppm) 7.15 (t, t, <sup>3</sup>J<sub>HH</sub> = 7.7 Hz, 2H, *para*-CH), 7.06 (d, <sup>3</sup>J<sub>HH</sub> = 7.7 Hz, 4H, *meta*-CH), 3.29 (m, 4H, NCH<sub>2</sub>), 3.20 (sept, <sup>3</sup>J<sub>HH</sub> = 7.0 Hz, 4H, CH(CH<sub>3</sub>)<sub>2</sub>), 1.62 (m, 4H, NCH<sub>2</sub>CH<sub>2</sub>), 1.48 (d, <sup>3</sup>J<sub>HH</sub> = 7.0 Hz, 12H, CH<sub>2</sub>(CH<sub>3</sub>)<sub>2</sub>), 1.27 (d, <sup>3</sup>J<sub>HH</sub> = 7.0 Hz, 12H, CH<sub>2</sub>(CH<sub>3</sub>)<sub>2</sub>). <sup>13</sup>C{<sup>1</sup>H} NMR (176 MHz, C<sub>6</sub>D<sub>6</sub>): δ (ppm) 212.6 (NCCu), 145.0 (*ortho*-C), 144.7 (*ipso*-C), 128.4 (*para*-C), 124.6 (*meta*-C), 54.1 (NCH<sub>2</sub>), 28.9 (CH(CH<sub>3</sub>)<sub>2</sub>), 25.9 (CH(CH<sub>3</sub>)<sub>2</sub>), 25.1 (NCH<sub>2</sub>CH<sub>2</sub>), 24.9 (CH(CH<sub>3</sub>)<sub>2</sub>). IR: ν (cm<sup>-1</sup>) 2958, 2927, 2864, 1486, 1427, 1384, 1361, 1320, 1299, 1286, 1177, 1105, 1057, 999, 938, 799, 721, 550, 446, 434.

**Note:** We have been unable to obtain satisfactory elemental analysis for **1**. The complex is extremely air-and moisture-sensitive. While NMR-silent impurities cannot be ruled out, we believe the <sup>1</sup>H and <sup>13</sup>C NMR spectra provided reflect the purity of the sample. After addition of 1,4-dichlorobutane to a benzene solution of **1** and concentration *in vacuo*, to remove tetrahydrothiophene, and excess 1,4-dichlorobutane, the more stable 7DippCuCl complex was isolated without further purification and the elemental analysis was obtained (see p. **S16**). We reasoned that only a sufficiently pure sample of **1** would give rise to analytically pure 7DippCuCl.

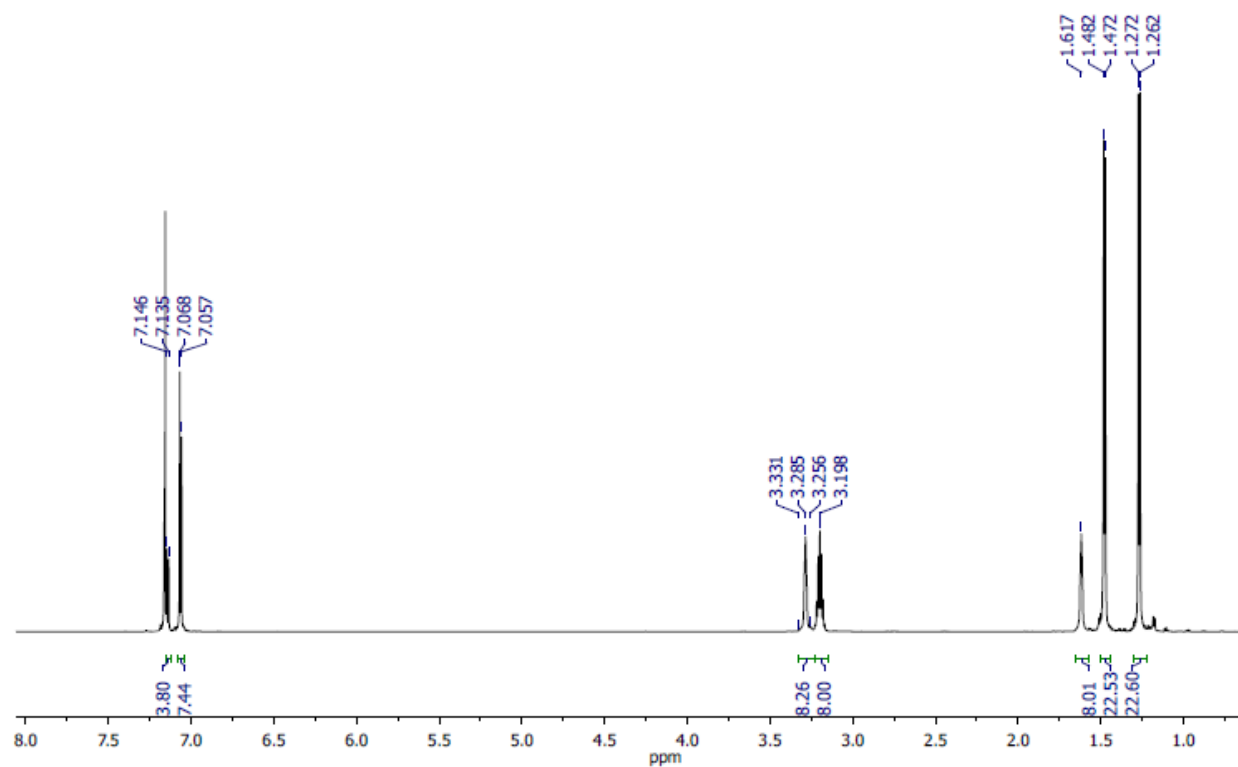

**Figure S1.** <sup>1</sup>H NMR spectrum of (7DippCu)<sub>2</sub>S in C<sub>6</sub>D<sub>6</sub>.

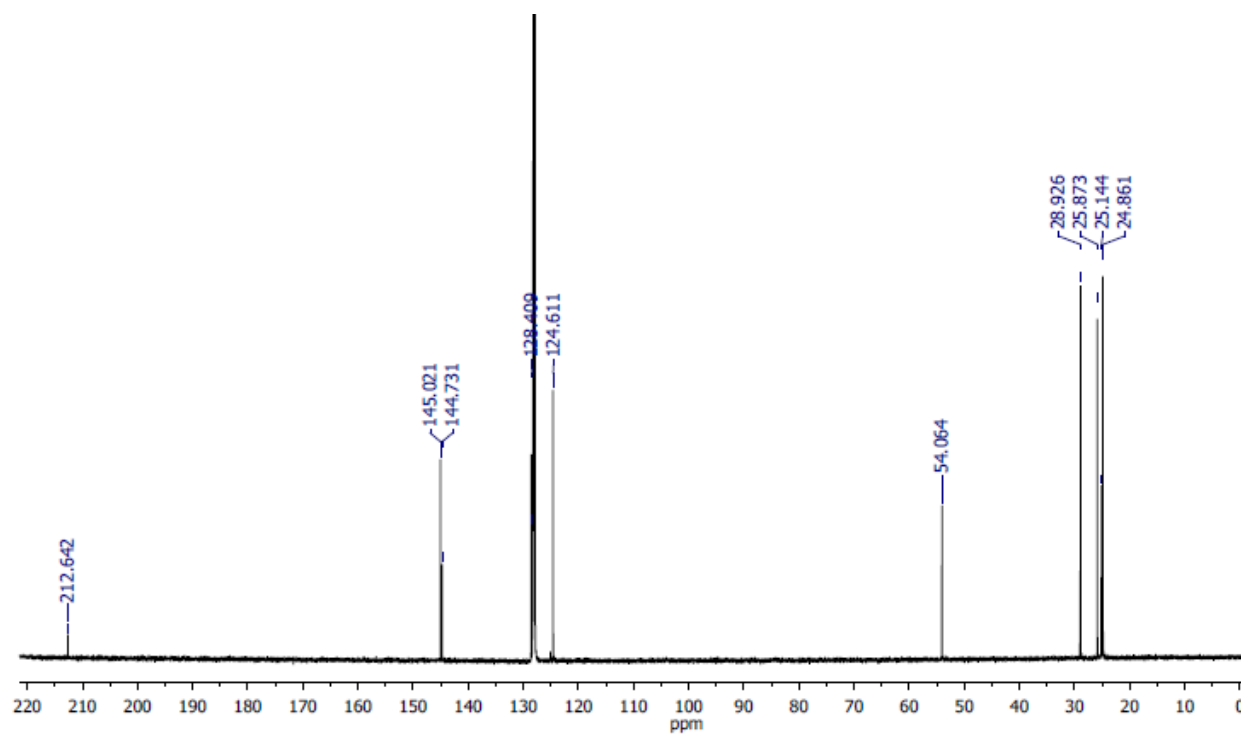

**Figure S2.** <sup>13</sup>C NMR spectrum of (7DippCu)<sub>2</sub>S in C<sub>6</sub>D<sub>6</sub>.

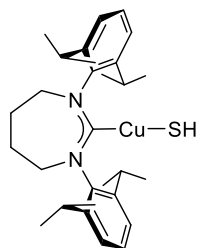

**7DippCuSH (2)** 7DippCuCl (0.202 g, 0.391 mmol) and potassium hydrosulfide (0.034 g, 0.47 mmol) were combined in a 20-mL vial, equipped with a stir bar, before MeOH (5 mL), and THF (10 mL) were added. The mixture was allowed to stir for 1h before the MeOH and THF were removed *in vacuo*. The product was extracted with CH<sub>2</sub>Cl<sub>2</sub> (3 x 3 mL) filtered through Celite and concentrated *in vacuo* to afford the title complex as a colorless solid. (0.185 g, 92% yield) <sup>1</sup>H NMR (700 MHz, C<sub>6</sub>D<sub>6</sub>): δ (ppm) 7.15 (t, <sup>3</sup>J<sub>HH</sub> = 7.7 Hz, 2H, para-CH), 7.04 (d, <sup>3</sup>J<sub>HH</sub> = 7.7 Hz, 4H, meta-CH), 3.27 (m, 4H, NCH<sub>2</sub>), 3.21 (sept, <sup>3</sup>J<sub>HH</sub> = 7.0 Hz, 4H, CH(CH<sub>3</sub>)<sub>2</sub>), 1.63 (m, 4H, NCH<sub>2</sub>CH<sub>2</sub>), 1.52 (d, <sup>3</sup>J<sub>HH</sub> = 7.0 Hz, 12H, CH<sub>2</sub>(CH<sub>3</sub>)<sub>2</sub>), 1.19 (d, <sup>3</sup>J<sub>HH</sub> = 7.0 Hz, 12H, CH<sub>2</sub>(CH<sub>3</sub>)<sub>2</sub>), -2.17 (s, 1H, Cu-SH). <sup>13</sup>C{<sup>1</sup>H} NMR (176 MHz, C<sub>6</sub>D<sub>6</sub>): δ (ppm) 211.4 (NCCu), 145.2 (ortho-C), 144.3 (ipso-C), 129.2 (para-C), 125.0 (meta-C), 53.4 (NCH<sub>2</sub>), 29.0 (CH(CH<sub>3</sub>)<sub>2</sub>), 25.2 (NCH<sub>2</sub>CH<sub>2</sub>), 25.1 (CH(CH<sub>3</sub>)<sub>2</sub>), 24.8 (CH(CH<sub>3</sub>)<sub>2</sub>). IR: ν (cm<sup>-1</sup>) 2960, 2938, 2865, 1494, 1447, 1385, 1362, 1323, 1309, 1190, 1177, 1095, 1033, 1000, 936, 902, 786, 552, 457. Anal. Calcd for C<sub>29</sub>H<sub>43</sub>CuN<sub>2</sub>S C, 67.60; H, 8.41; N, 5.44. Found C, 67.60; H, 8.58; N, 5.40.

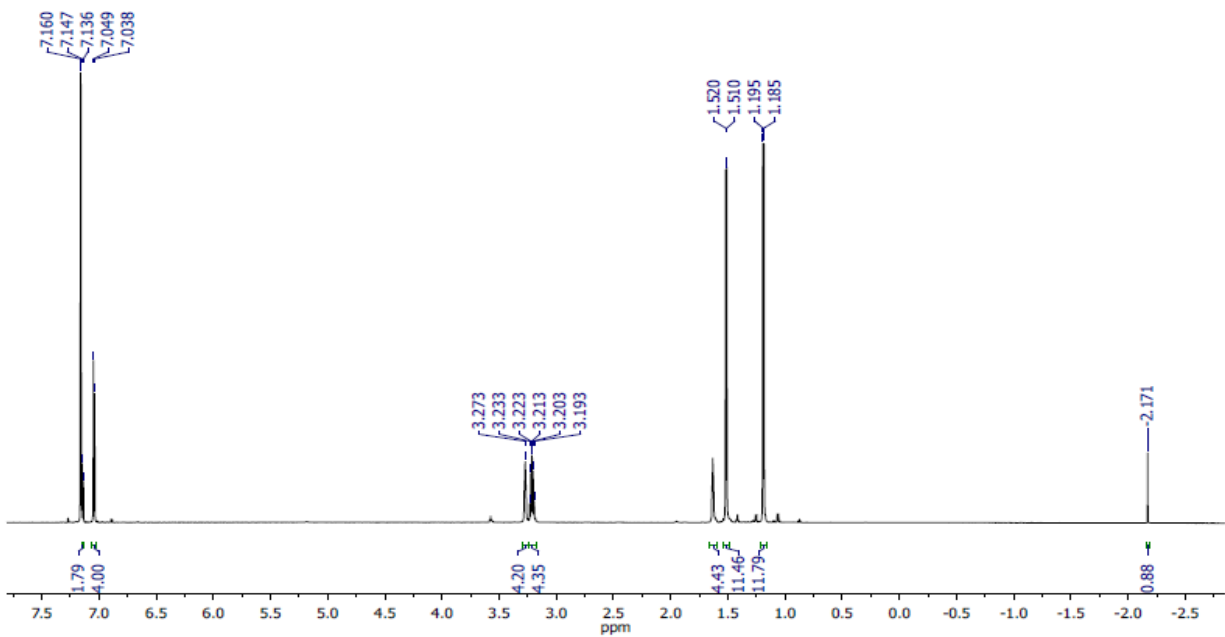

**Figure S3.** <sup>1</sup>H NMR spectrum of 7DippCuSH in C<sub>6</sub>D<sub>6</sub>.

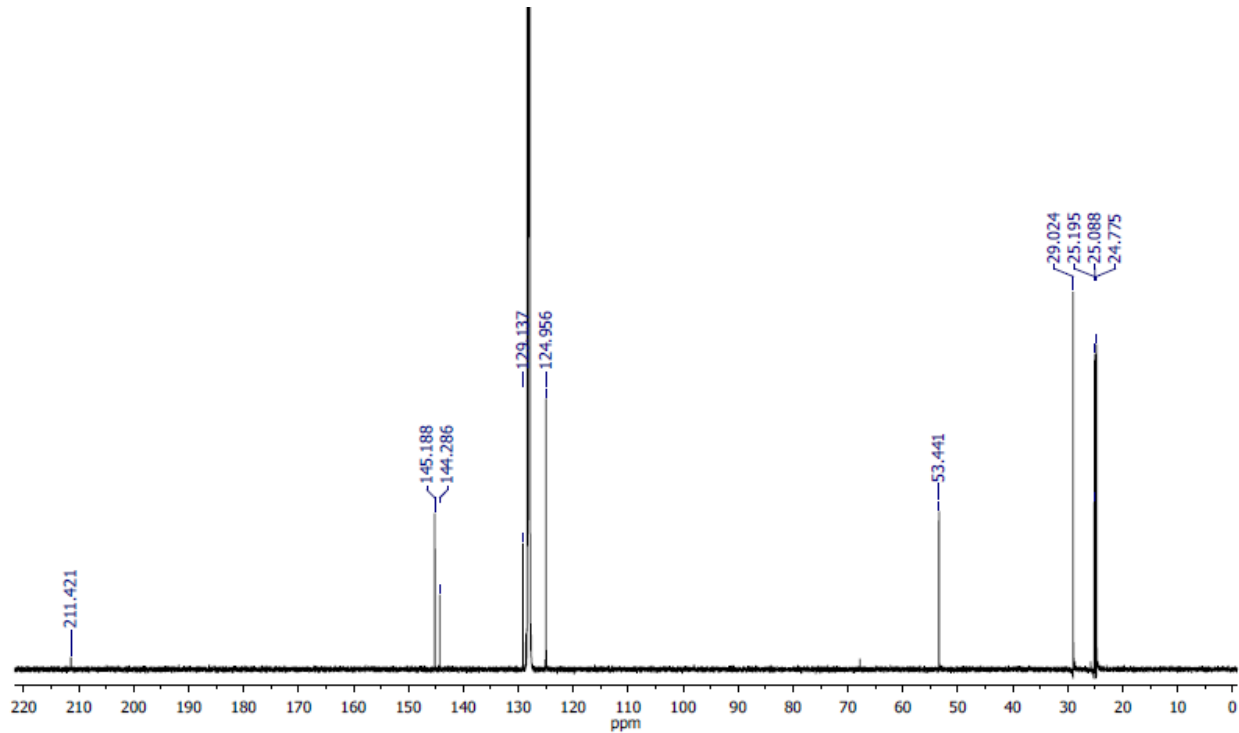

**Figure S4.** <sup>13</sup>C NMR spectrum of 7DippCuSH in C<sub>6</sub>D<sub>6</sub>.

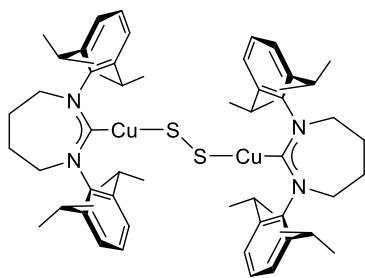

**(7DippCuS)<sub>2</sub> (4)** 7DippCuO-*t*-Bu (0.074 g, 0.13 mmol) and 2-phenylacetic dithioperxoyanhydride (0.020 g, 0.066 mmol) were combined in a 20-mL vial, equipped with a stir bar, before C<sub>6</sub>H<sub>6</sub> (5 mL) were added. The mixture was allowed to stir for 1h before the C<sub>6</sub>H<sub>6</sub> was removed *in vacuo*. The resulting yellow solid was washed with pentane (3 x 3 mL), the recrystallized from CH<sub>3</sub>CN (5 mL) at -35 °C. The resulting solid was dried under *in vacuo* to afford the product as an orange solid. (0.040 g, 58% yield) <sup>1</sup>H NMR (700 MHz, C<sub>6</sub>D<sub>6</sub>): δ (ppm) 7.17 (t, <sup>3</sup>J<sub>HH</sub> = 7.7 Hz, 4H, *para*-CH), 7.07 (d, <sup>3</sup>J<sub>HH</sub> = 7.7 Hz, 8H, *meta*-CH), 3.32 (m, 8H, NCH<sub>2</sub>), 3.23 (sept, <sup>3</sup>J<sub>HH</sub> = 7.0 Hz, 8H, CH(CH<sub>3</sub>)<sub>2</sub>), 1.64 (m, 8H, NCH<sub>2</sub>CH<sub>2</sub>), 1.54 (d, <sup>3</sup>J<sub>HH</sub> = 7.0 Hz, 24H, CH<sub>2</sub>(CH<sub>3</sub>)<sub>2</sub>), 1.25 (d, <sup>3</sup>J<sub>HH</sub> = 7.0 Hz, 24H, CH<sub>2</sub>(CH<sub>3</sub>)<sub>2</sub>). <sup>13</sup>C{<sup>1</sup>H} NMR (176 MHz, C<sub>6</sub>D<sub>6</sub>): δ (ppm) 213.9 (NCCu), 145.0 (*ortho*-C), 144.7 (*ipso*-C), 128.8 (*para*-C), 125.0 (*meta*-C), 53.6 (NCH<sub>2</sub>), 29.1 (CH(CH<sub>3</sub>)<sub>2</sub>), 25.4 (CH(CH<sub>3</sub>)<sub>2</sub>), 25.2 (NCH<sub>2</sub>CH<sub>2</sub>), 25.0 (CH(CH<sub>3</sub>)<sub>2</sub>). IR: ν (cm<sup>-1</sup>) 2957, 2926, 2865, 1498, 1446, 1385, 1363, 1312, 1290, 1222, 1096, 1055, 935, 899, 801, 756, 629, 504, 406.

**Note:** We have been unable to obtain satisfactory elemental analysis for **4**. The complex is extremely air-and moisture-sensitive. While NMR-silent impurities cannot be ruled out, we believe the <sup>1</sup>H and <sup>13</sup>C NMR spectra provided reflect the purity of the sample.



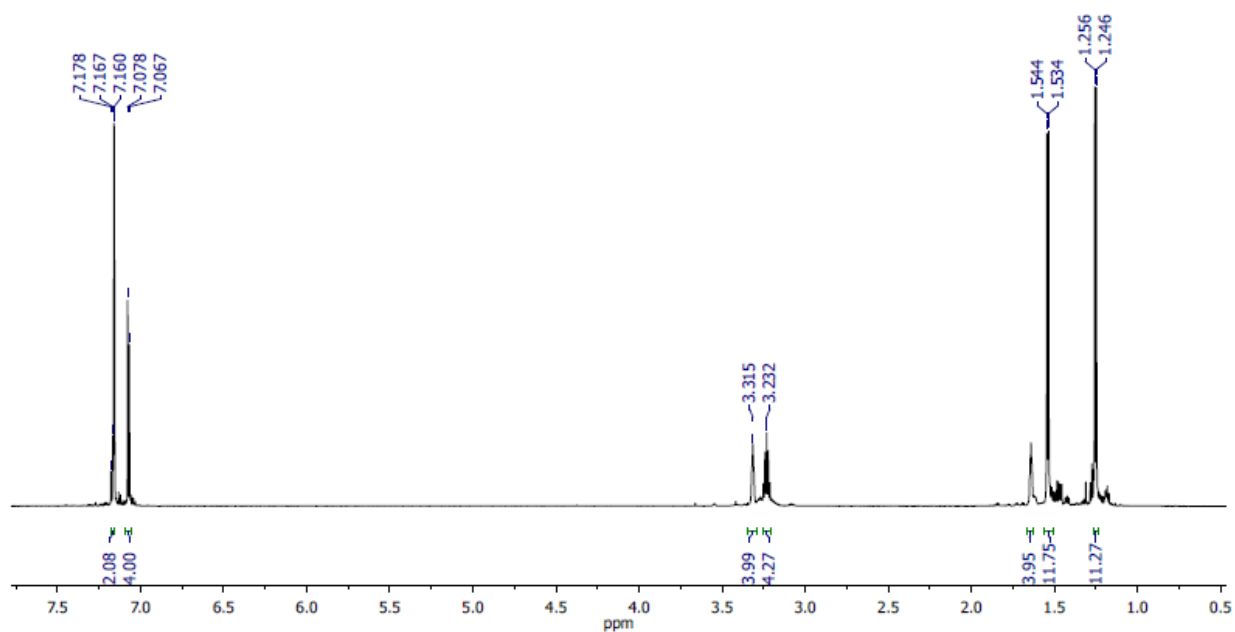

**Figure S5.** <sup>1</sup>H NMR spectrum of (7DippCuS)<sub>2</sub> in C<sub>6</sub>D<sub>6</sub>.

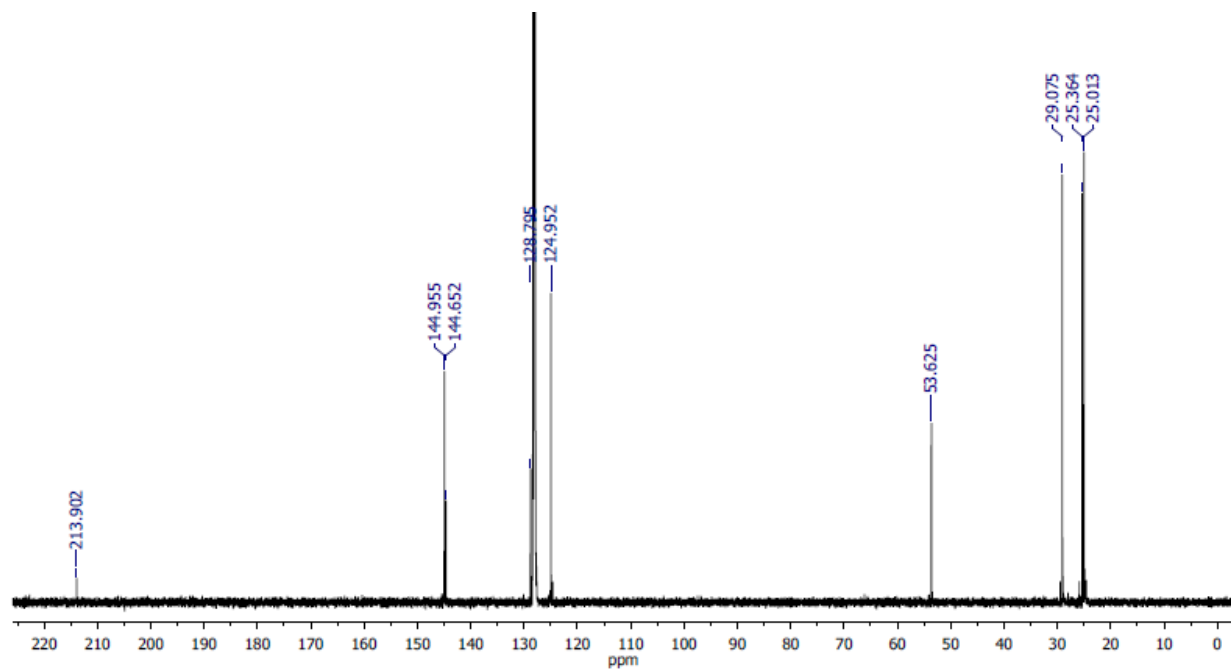

**Figure S6.** <sup>13</sup>C NMR spectrum of (7DippCuS)<sub>2</sub> in C<sub>6</sub>D<sub>6</sub>.

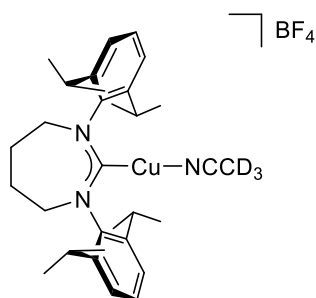

**7DippCu(NCCD<sub>3</sub>)BF<sub>4</sub> (5)** 7DippCuCl (0.059 g, 0.11 mmol) and silver tetrafluoroborate (0.022 g, 0.11 mmol) were combined in a 20-mL vial, equipped with a stir bar, before CD<sub>3</sub>CN (0.1 mL) and DCM (3 mL) were added. The mixture was allowed to stir for 15 min, filtered through Celite, and concentrated *in vacuo*. The resulting colorless solid was dissolved in ethyl acetate (3 mL), layered with hexanes (5 mL) and placed in the freezer overnight. The resulting colorless solid was collected and dried *in vacuo* to afford the title complex. (0.051 g, 74% yield) <sup>1</sup>H NMR (700 MHz, CD<sub>3</sub>CN): δ (ppm) 7.33 (t, <sup>3</sup>J<sub>HH</sub> = 7.7 Hz, 2H, para-CH), 7.26 (d, <sup>3</sup>J<sub>HH</sub> = 7.7 Hz, 4H, meta-CH), 3.98 (m, 4H, NCH<sub>2</sub>), 3.30 (sept, <sup>3</sup>J<sub>HH</sub> = 7.0 Hz, 4H, CH(CH<sub>3</sub>)<sub>2</sub>), 2.29 (m, 4H, NCH<sub>2</sub>CH<sub>2</sub>), 1.29 (d, <sup>3</sup>J<sub>HH</sub> = 7.0 Hz, 12H, CH<sub>2</sub>(CH<sub>3</sub>)<sub>2</sub>) 1.27 (d, <sup>3</sup>J<sub>HH</sub> = 7.0 Hz, 12H, CH<sub>2</sub>(CH<sub>3</sub>)<sub>2</sub>) <sup>13</sup>C{<sup>1</sup>H} NMR (176 MHz, CD<sub>3</sub>CN): δ (ppm) 213.2 (NCCu), 146.4 (*ortho*-C), 146.2 (*ipso*-C), 129.4 (*para*-C), 125.5 (*meta*-C), 55.1 (NCH<sub>2</sub>), 29.3 (CH(CH<sub>3</sub>)<sub>2</sub>), 26.0 (NCH<sub>2</sub>CH<sub>2</sub>), 25.1 (CH(CH<sub>3</sub>)<sub>2</sub>), 24.4 (CH(CH<sub>3</sub>)<sub>2</sub>). <sup>19</sup>F NMR (378 MHz, CD<sub>3</sub>CN): δ (ppm) -152.4 (4F, BF<sub>4</sub><sup>-</sup>). IR: ν (cm<sup>-1</sup>) 2967, 2931, 2865, 1487, 1449, 1383, 1362, 1308, 1095, 1053, 1002, 934, 806, 790, 763, 612, 557, 518, 490.

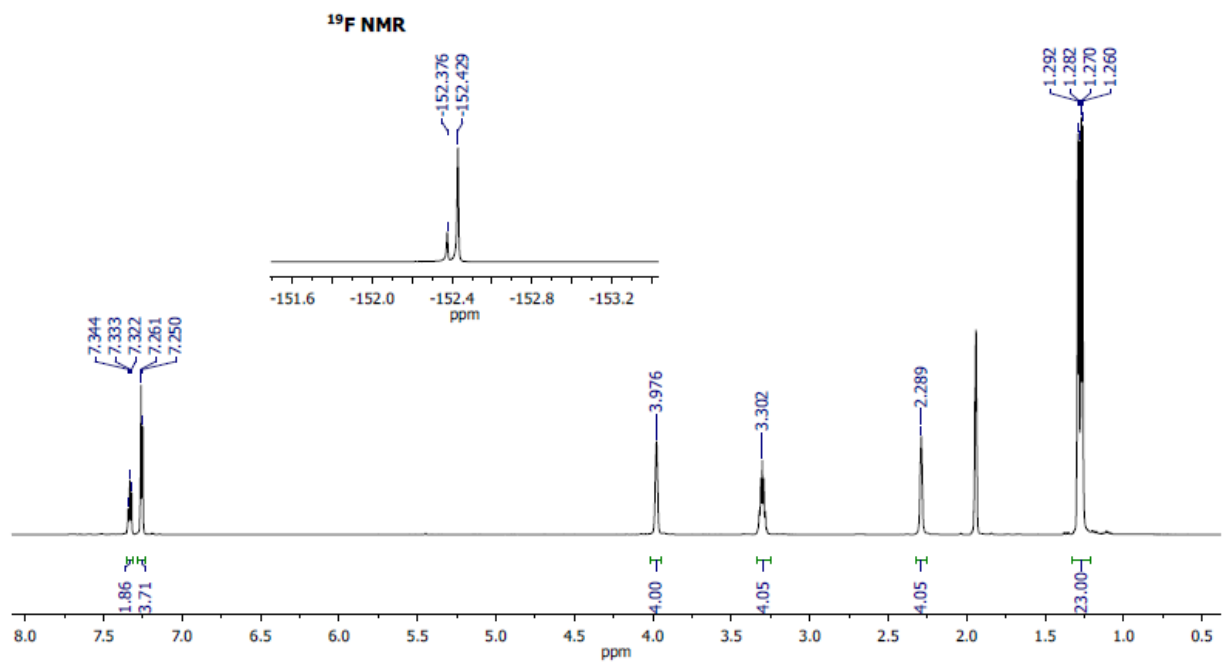

**Figure S7.** <sup>1</sup>H NMR spectrum of 7DippCu(NCCD<sub>3</sub>)BF<sub>4</sub> overlaid with the BF<sub>4</sub><sup>-</sup> resonance in <sup>19</sup>F NMR spectrum in CD<sub>3</sub>CN.

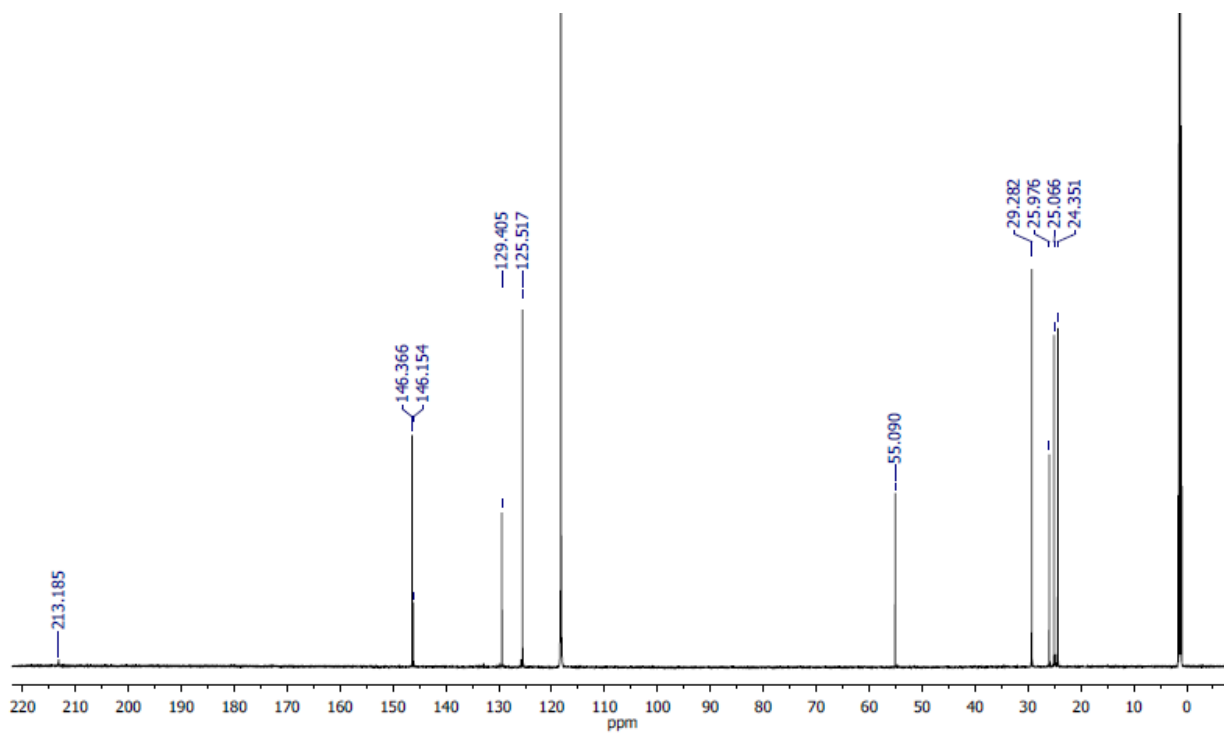

**Figure S8.** <sup>13</sup>C NMR spectrum of 7DippCu(NCCD<sub>3</sub>)BF<sub>4</sub> in CD<sub>3</sub>CN.

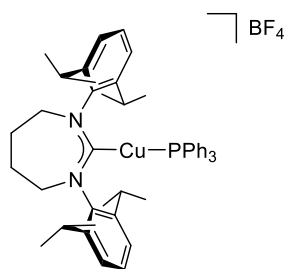

**7DippCu(PPh<sub>3</sub>)BF<sub>4</sub>** 7DippCuCl (0.067 g, 0.13 mmol), triphenylphosphine (0.034, 0.13 mmol) and silver tetrafluoroborate (0.025 g, 0.13 mmol) were combined in a 20-mL vial, equipped with a stir bar, before DCM (5 mL) was added. The mixture was allowed to stir for 15 min, filtered through Celite, before the resulting colorless solution was layered with pentane (8 mL) and placed in the freezer at  $-35\text{ }^{\circ}\text{C}$  for 16h. The resulting crystals were dried *in vacuo* for 1h to afford the title complex. (0.090 g, 84 % yield)  $^1\text{H}$  NMR (400 MHz,  $\text{CD}_2\text{Cl}_2$ ):  $\delta$  (ppm) 7.48-7.44 (m, 4H, dipp *para*-CH, PPh<sub>3</sub> *para*-CH), 7.32-7.26 (m, 10H, dipp *meta*-CH, PPh<sub>3</sub> *meta*-CH), 6.63-6.58 (m, PPh<sub>3</sub> *ortho*-CH), 4.07 (m, 4H, NCH<sub>2</sub>), 3.27 (sept,  $^3J_{\text{HH}} = 6.8\text{ Hz}$ , 4H, CH(CH<sub>3</sub>)<sub>2</sub>), 2.40 (m, 4H, NCH<sub>2</sub>CH<sub>2</sub>), 1.33 (d,  $^3J_{\text{HH}} = 6.8\text{ Hz}$ , 12H, CH<sub>2</sub>(CH<sub>3</sub>)<sub>2</sub>), 1.05 (d,  $^3J_{\text{HH}} = 6.8\text{ Hz}$ , 12H, CH<sub>2</sub>(CH<sub>3</sub>)<sub>2</sub>).  $^{13}\text{C}\{^1\text{H}\}$  NMR (176 MHz  $\text{CD}_2\text{Cl}_2$ ):  $\delta$  (ppm) 206.1 (d,  $^2J_{\text{PC}} = 60.2\text{ Hz}$ , NCCu), 146.0 (dipp *ortho*-C), 143.8 (dipp *ipso*-C), 133.7 (d,  $^2J_{\text{PC}} = 14.1\text{ Hz}$ , PPh<sub>3</sub> *ortho*-C), 131.9 (d,  $^4J_{\text{PC}} = 2.1\text{ Hz}$ , PPh<sub>3</sub> *para*-C), 130.1 (*para*-C), 129.6 (d,  $^3J_{\text{PC}} = 5.5\text{ Hz}$ , PPh<sub>3</sub> *para*-C), 127.8 (d,  $^1J_{\text{PC}} = 45.9\text{ Hz}$ , PPh<sub>3</sub> *ipso*-C), 125.8 (dipp *meta*-C) 55.0 (NCH<sub>2</sub>), 29.2 (CH(CH<sub>3</sub>)<sub>2</sub>), 25.5 (NCH<sub>2</sub>CH<sub>2</sub>), 25.2 (CH(CH<sub>3</sub>)<sub>2</sub>), 24.7 (CH(CH<sub>3</sub>)<sub>2</sub>).  $^{31}\text{P}\{^1\text{H}\}$  NMR (162 MHz,  $\text{CD}_2\text{Cl}_2$ ):  $\delta$  (ppm) 7.7 (Cu-PPh<sub>3</sub>).  $^{19}\text{F}$  NMR (378 MHz,  $\text{CD}_2\text{Cl}_2$ ):  $\delta$  (ppm)  $-152.7$  (4F, BF<sub>4</sub><sup>−</sup>). IR:  $\nu$  (cm<sup>−1</sup>) 2961, 2922, 2845, 1506, 1436, 1315, 1094, 1046, 998, 900, 807, 748, 675, 530, 506, 489, 451. Anal. Calcd for C<sub>47</sub>H<sub>57</sub>CuN<sub>2</sub>BF<sub>4</sub>P C, 67.91; H, 6.91; N, 3.37. Found C, 67.45; H, 6.73; N, 3.47.

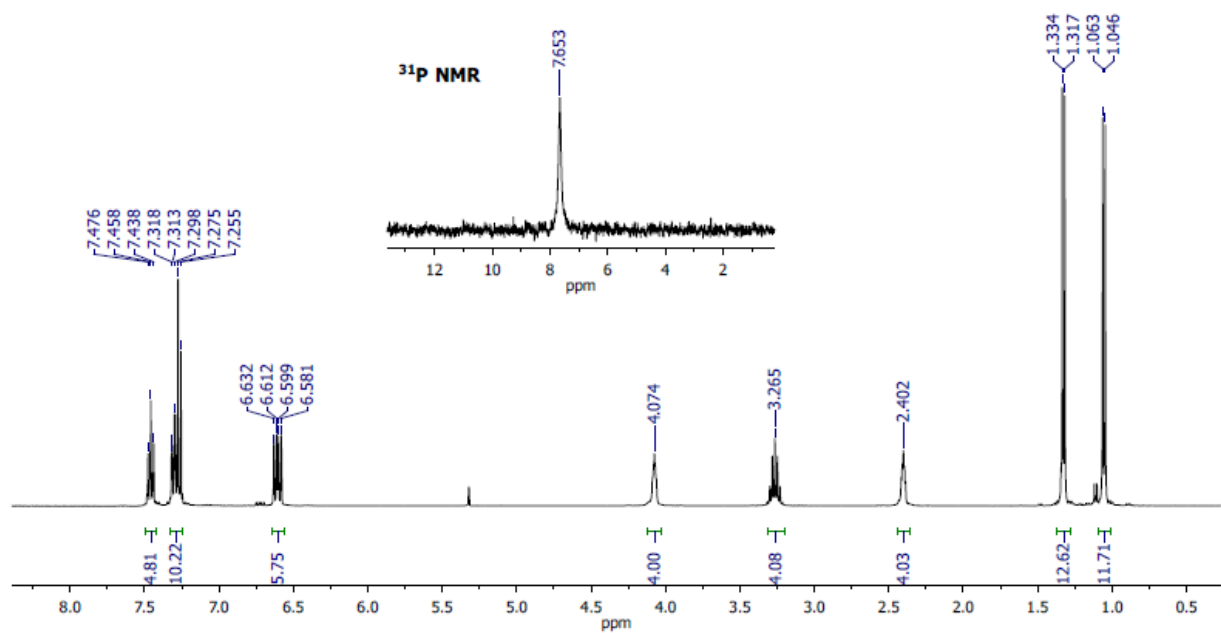

**Figure S9.**  $^1\text{H}$  and  $^{31}\text{P}$  NMR spectra of  $7\text{DippCu}(\text{PPh}_3)\text{BF}_4$  in  $\text{CD}_2\text{Cl}_2$ .

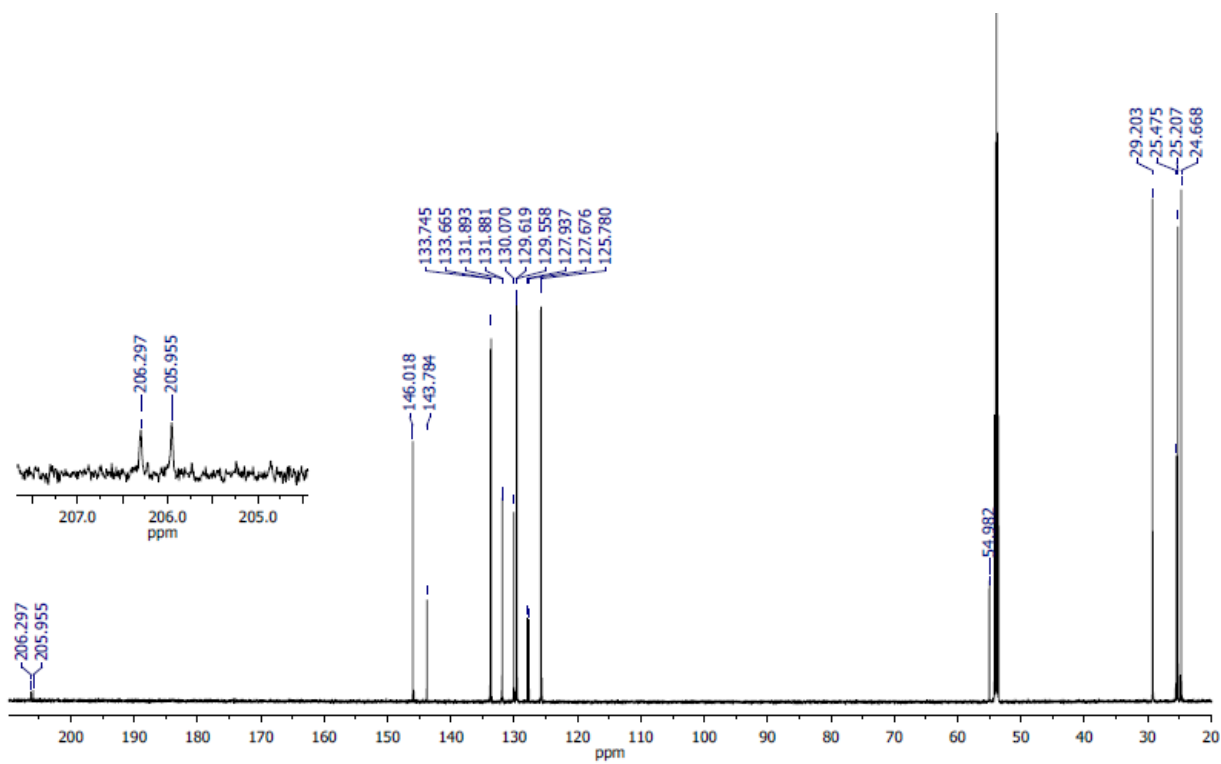

**Figure S10.**  $^{13}\text{C}$  NMR spectrum of  $7\text{DippCu}(\text{PPh}_3)\text{BF}_4$  in  $\text{CD}_2\text{Cl}_2$ .

Deprotonation of **2** by **3**.

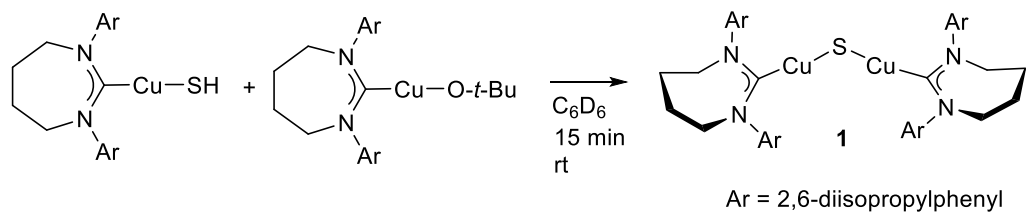

7DippCuSH (**2**, 0.013 g, 0.025 mmol) and 7DippCuO-*t*-Bu (**3**, 0.014 g, 0.025 mmol) were dissolved in C<sub>6</sub>D<sub>6</sub> (0.75 mL) and mixed for 15 min before the <sup>1</sup>H NMR spectrum was recorded.

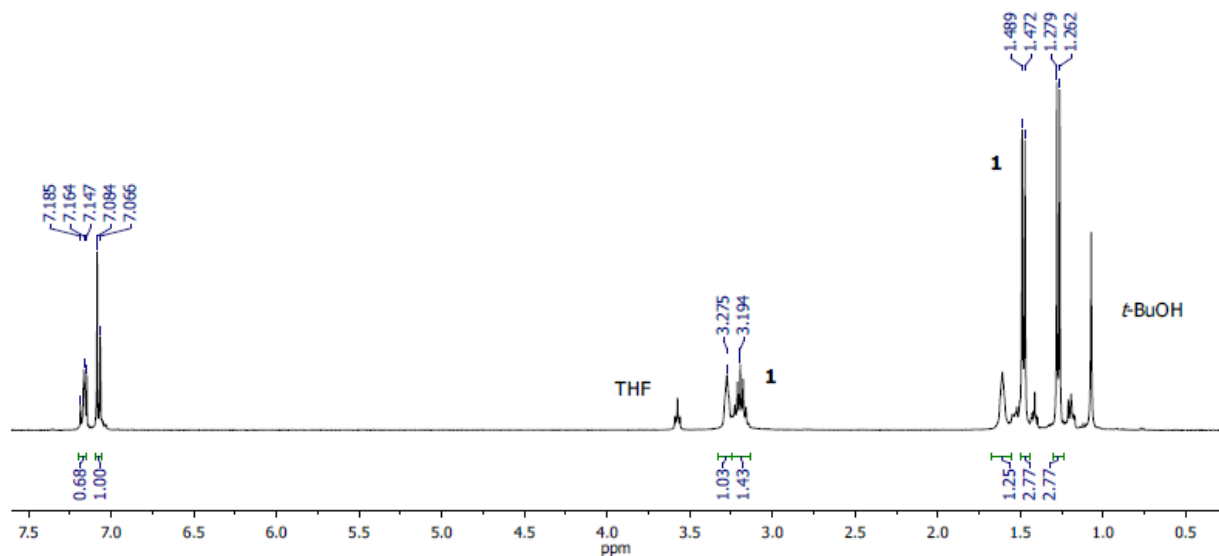

**Figure S11.** <sup>1</sup>H NMR spectrum of reaction of **2** and **3**.

Deprotonation of **2** by NaO-*t*-Bu.

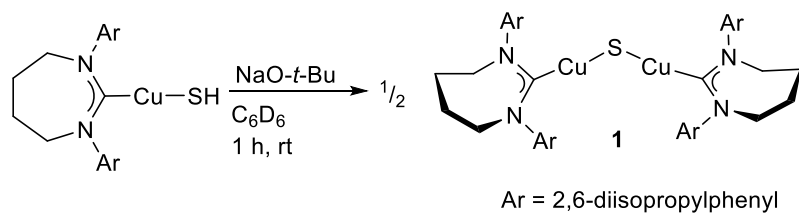

7DippCuSH (**2**, 0.028 g, 0.054 mmol) and NaO-*t*-Bu (0.010 g, 0.010 mmol) were dissolved in C<sub>6</sub>D<sub>6</sub> (0.75 mL) and mixed for 1 h before the <sup>1</sup>H NMR spectrum was recorded.

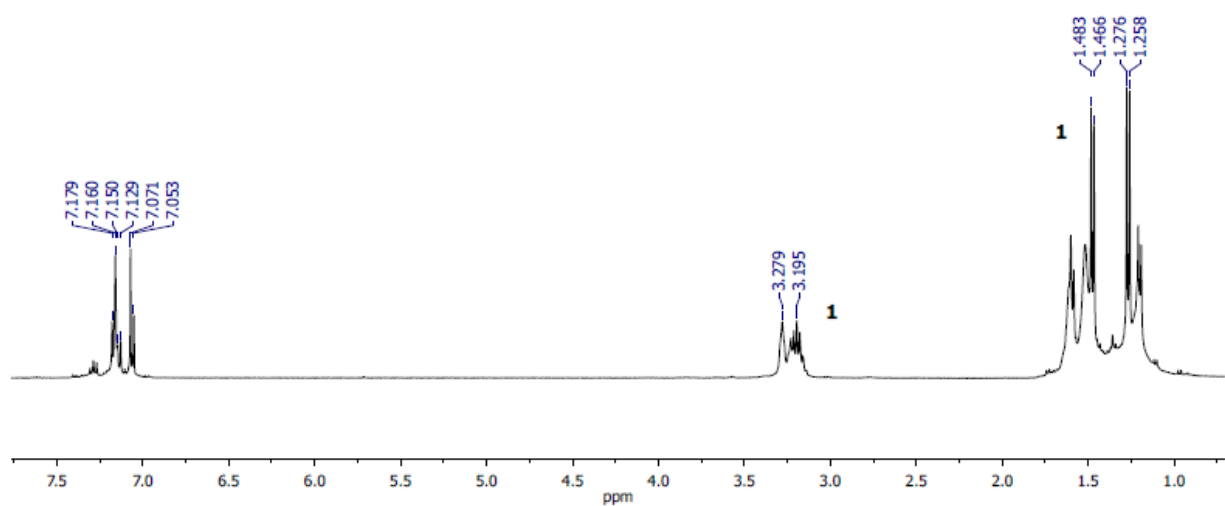

**Figure S12.** <sup>1</sup>H NMR spectrum of reaction of **2** and NaO-*t*-Bu.

Conversion of **1** to 7DippCuCl and tetrahydrothiophene for elemental analysis.

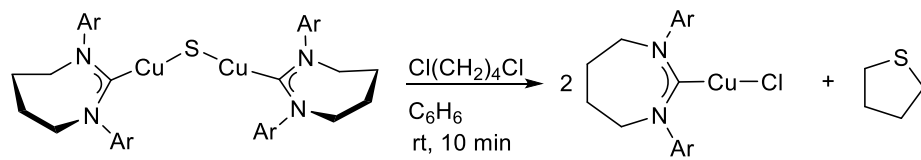

Ar = 2,6-diisopropylphenyl

1,4-Dichlorobutane (11  $\mu$ L, 0.10 mmol) was added to a solution of (7DippCu)<sub>2</sub>S (0.020 g, 0.020 mmol) in C<sub>6</sub>D<sub>6</sub> (2 mL) and mixed for 10 min. The solution was then concentrated *in vacuo* and a small amount was dissolved in CDCl<sub>3</sub> and the <sup>1</sup>H NMR spectrum was recorded. The solid was dried under vacuum for 48 h to remove the excess 1,4-dichlorobutane. Anal. Calcd for C<sub>29</sub>H<sub>42</sub>ClCuN<sub>2</sub>: C, 67.29; H, 8.18; N, 5.41. Found C, 67.19; H, 8.17; N, 5.28.

**Note:** Hillhouse and coworkers had previously shown that the IPr\*- (IPr\* = 1,3-bis(2,6-(diphenylmethyl)-4-methylphenyl)imidazol-2-ylidene) supported dicopper sulfide reacts with dibromoalkanes to generate the corresponding (NHC)copper(I) bromide and cyclic thioether.<sup>2</sup>



## Conversion of **4** to **1**

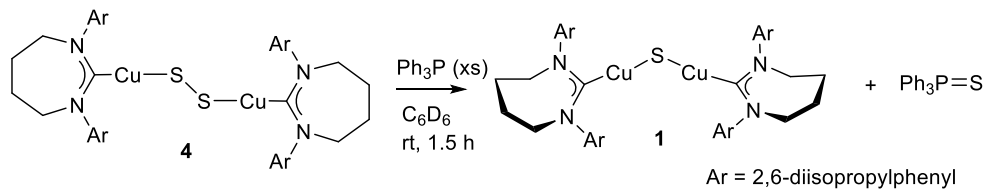

(7DippCuS)<sub>2</sub> (**4**, 0.010 g, 0.0097 mmol) was dissolved in C<sub>6</sub>D<sub>6</sub> and a <sup>1</sup>H NMR spectrum was recorded. Triphenylphosphine (Ph<sub>3</sub>P, 0.009 g, 0.03 mmol) was added and the <sup>1</sup>H and <sup>31</sup>P NMR spectra were recorded after 1.5 h.

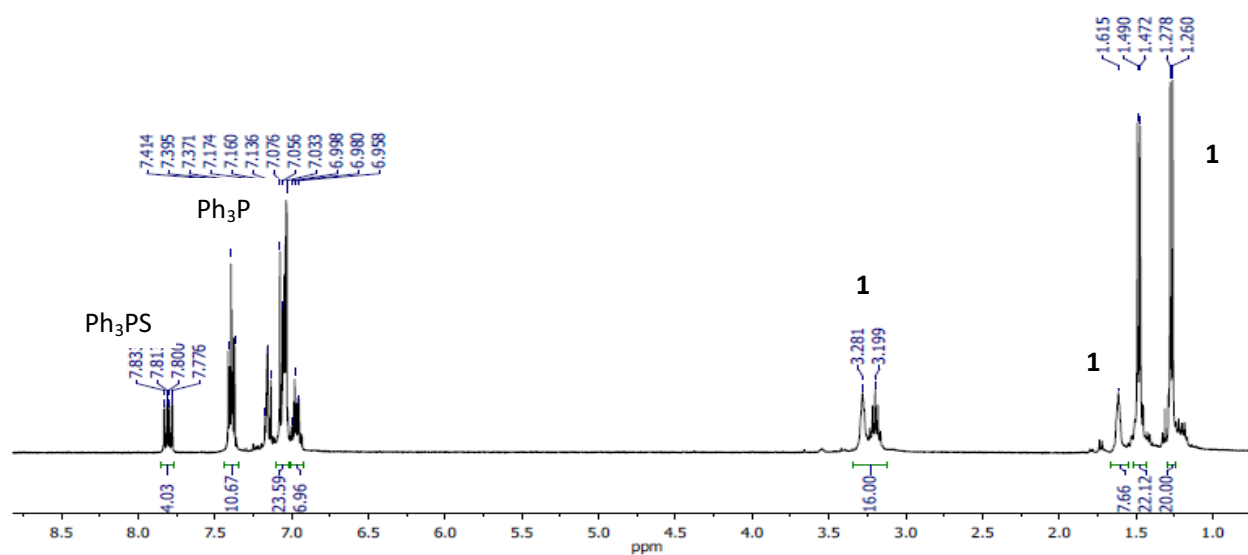

**Figure S13.** <sup>1</sup>H NMR spectrum after Ph<sub>3</sub>P was added to **4**, generating **1** and Ph<sub>3</sub>PS.

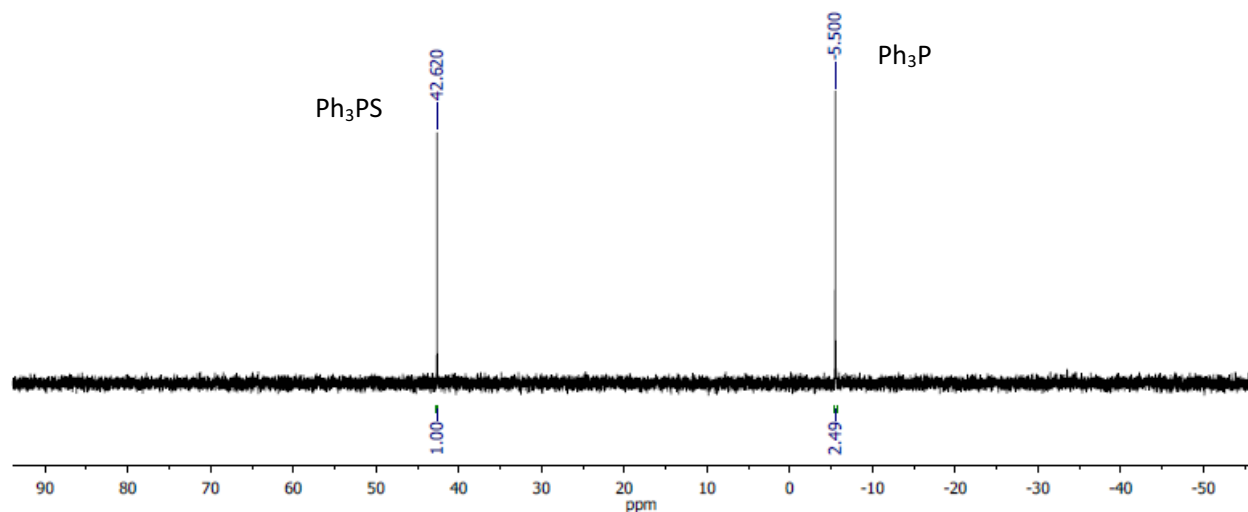

**Figure S14.** <sup>31</sup>P NMR spectrum after Ph<sub>3</sub>P was added to **4**.

Nitrosonium reactivity of **2**.

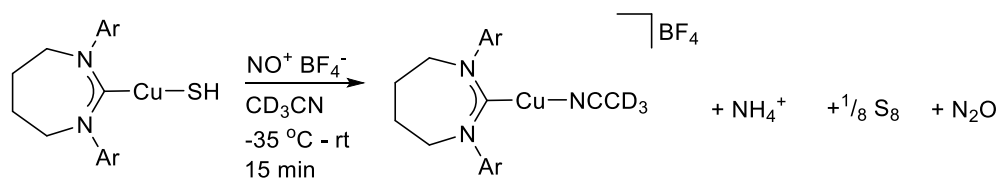

$\text{NO}^+\text{BF}_4^-$  (0.007 g, 0.060 mmol) was added to a solution of 7DippCuSH (0.030 g, 0.060 mmol) in  $\text{CD}_3\text{CN}$  (1 mL) at  $-35^\circ\text{C}$ . The mixture was allowed to warm to room temperature with stirring before the  $^1\text{H}$  NMR spectrum was recorded.

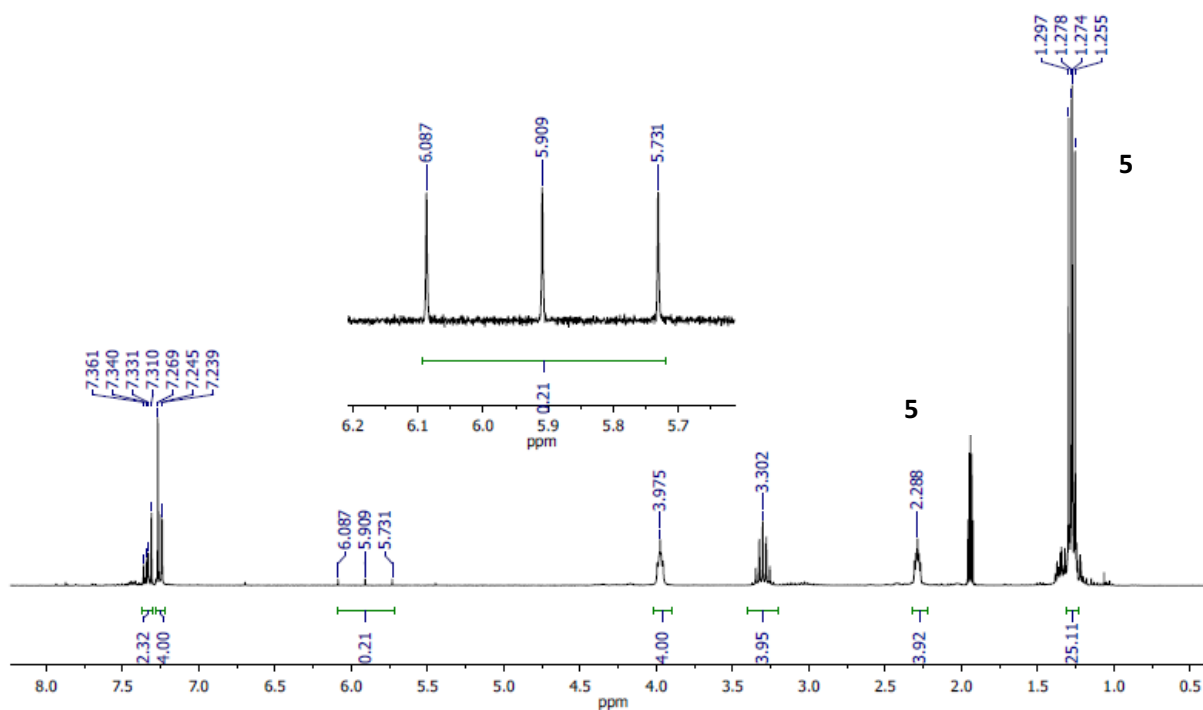

**Figure S15.**  $^1\text{H}$  NMR spectrum following addition of  $\text{NO}^+\text{BF}_4^-$  to **2**, resulting in **5** in  $\text{CD}_3\text{CN}$ .

Nitrosonium reactivity of **2** (cont'd)

Triphenylphosphine (0.016 g, 0.060 mmol) was added and the  $^1\text{H}$  and  $^{31}\text{P}$  NMR spectra were recorded after 15 min.

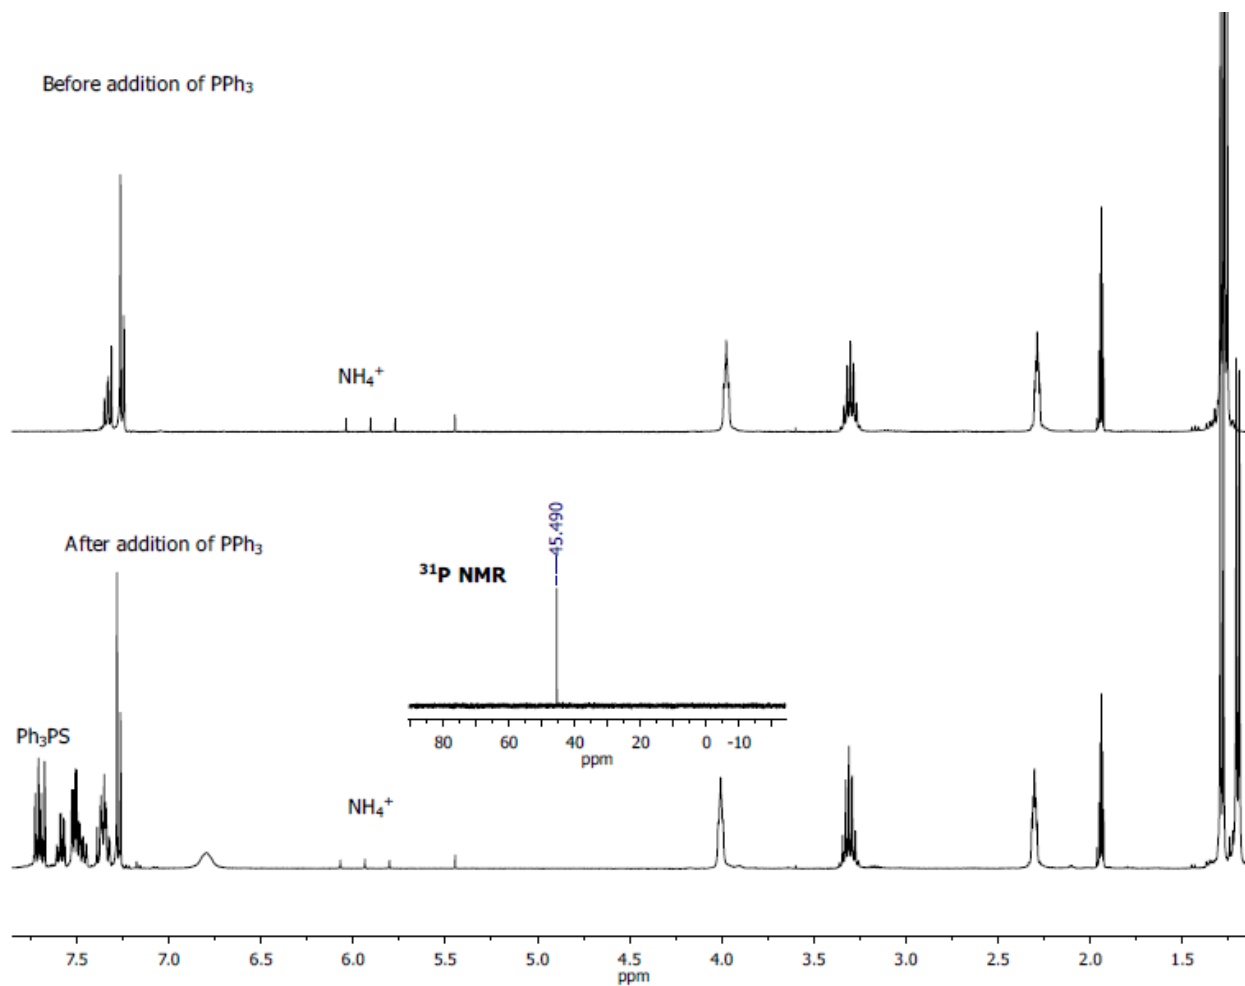

**Figure S16.**  $^1\text{H}$  and  $^{31}\text{P}$  spectrum following addition of  $\text{Ph}_3\text{P}$  in  $\text{CD}_3\text{CN}$ .

## GC-MS detection of N<sub>2</sub>O.

Selected ion recording (SIR) of  $m/z$  44 (N<sub>2</sub>O) was performed on a 50  $\mu$ L sample of the reaction headspace. As a control set up, to rule out CO<sub>2</sub> ( $m/z$  44), SIR was also performed on a 50  $\mu$ L sample of the headspace of a vial prepared in the glovebox with just solvent added. The headspace analysis of a reaction of NO<sup>+</sup> (0.007 g, 0.06 mmol) with 7DippCuSH (0.030 g, 0.060 mmol) showed an integration of the  $m/z$  44 peak to be 15 times that of the headspace analysis of the control set up.

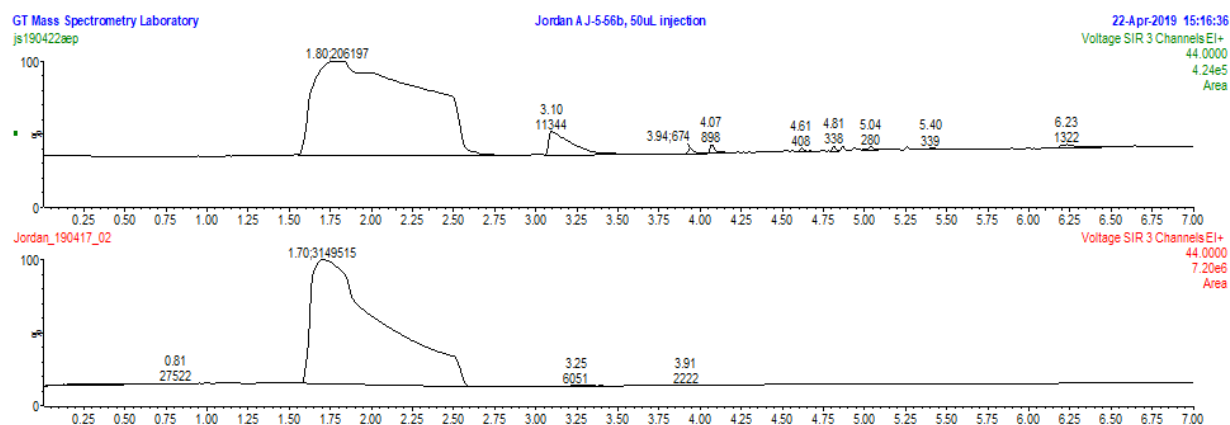

**Figure S17.** GC-MS SIR headspace analysis of the control set up (top) and the reaction of 7DippCuSH with NO<sup>+</sup> (bottom).

## Nitrosonium Reactivity of **1**

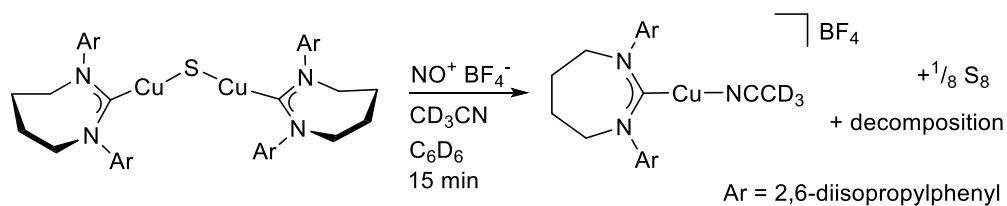

NO<sup>+</sup>BF<sub>4</sub><sup>-</sup> (0.003 g, 0.026 mmol) was added to a solution of (7DippCu)<sub>2</sub>S (0.025 g, 0.025 mmol) in CD<sub>3</sub>CN (0.5 mL) and C<sub>6</sub>D<sub>6</sub> (0.5 mL) at room temperature. The mixture was allowed to stir for 15 min, filtered through celite to remove deposited Cu<sup>0</sup>, and concentrated *in vacuo*. The resulting solid was dried for 2 h under vacuum. (0.015 g, 93% of **5** + S). The solid was taken up in CD<sub>3</sub>CN (0.6 mL) before the <sup>1</sup>H NMR spectrum was recorded.

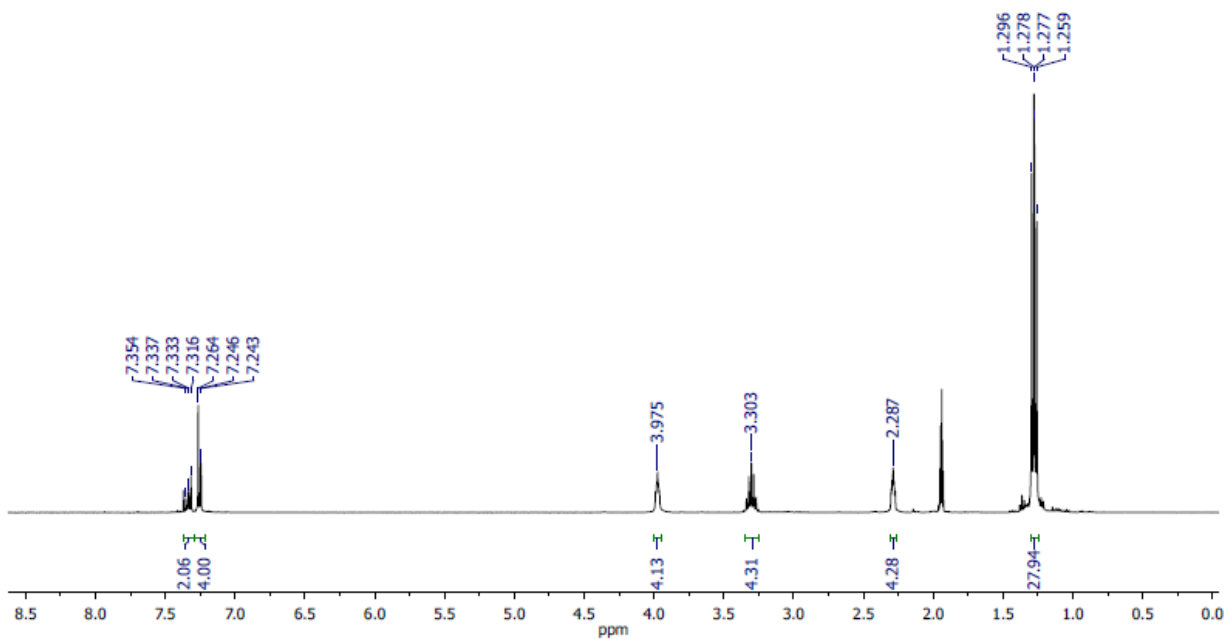

**Figure S18.** <sup>1</sup>H NMR spectrum of **1** in CD<sub>3</sub>CN after reaction with NO<sup>+</sup>BF<sub>4</sub><sup>-</sup>.

### Nitrosonium Reactivity of **1** (cont'd)

Triphenylphosphine (0.013 g, 0.050 mmol) was then added, and the solution was reanalyzed by NMR spectroscopy.

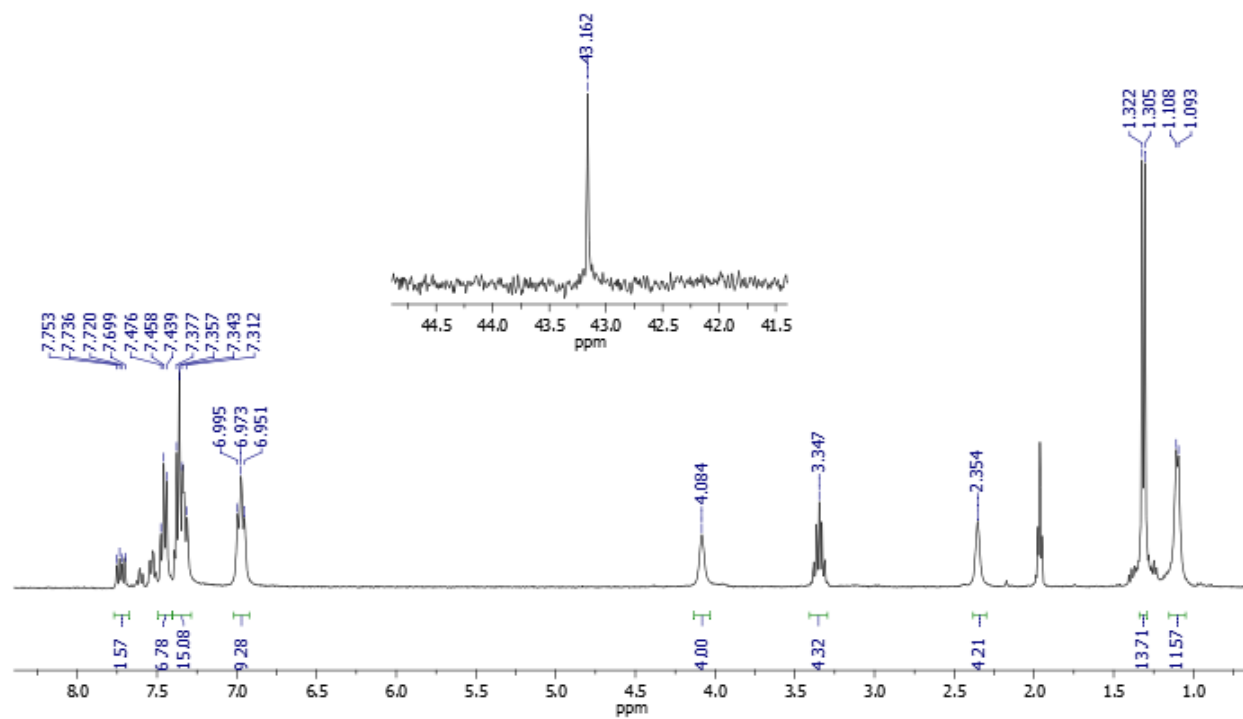

**Figure S19.**  $^1\text{H}$  and  $^{31}\text{P}$  NMR spectra following addition of  $\text{Ph}_3\text{P}$ , resulting in  $\text{Ph}_3\text{P}=\text{S}$  in  $\text{CD}_3\text{CN}$ .

## Nitrosonium Reactivity of **1** in C<sub>6</sub>H<sub>5</sub>F

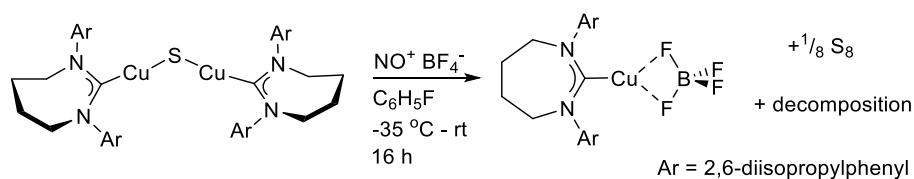

A solution of (7DippCu)<sub>2</sub>S (0.050 g, 0.050 mmol) in C<sub>6</sub>H<sub>5</sub>F (2 mL) was slowly added to solid NO<sup>+</sup>BF<sub>4</sub><sup>−</sup> (0.006 g, 0.052 mmol) at −40 °C. The mixture was allowed to stir at −40 °C for 4h before it was allowed to warm to room temperature while stirring for an additional 12h. The resulting mixture was filtered through Celite to remove the precipitate and concentrated *in vacuo*. The resulting colorless solid was taken up in CD<sub>2</sub>Cl<sub>2</sub> and analyzed by NMR spectroscopy.

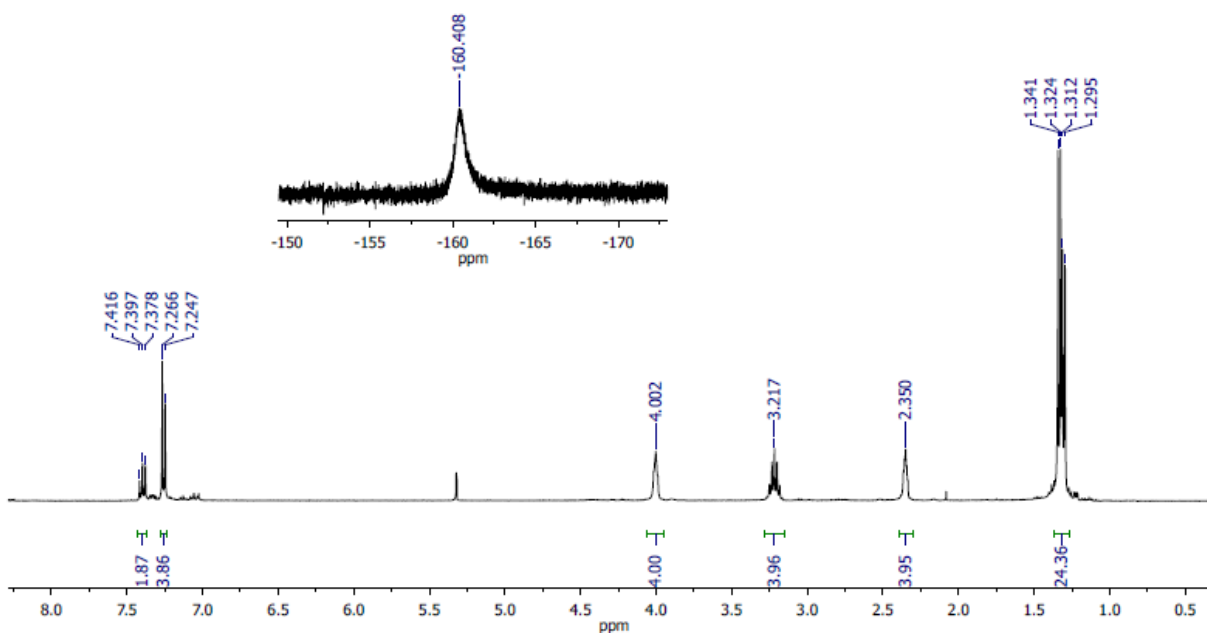

**Figure S20.** <sup>1</sup>H NMR spectrum of **1** after reaction with NO<sup>+</sup>BF<sub>4</sub><sup>−</sup> with <sup>19</sup>F NMR spectra overlaid in CD<sub>2</sub>Cl<sub>2</sub>.

Nitrosonium Reactivity of **1** in C<sub>6</sub>H<sub>5</sub>F (cont'd)

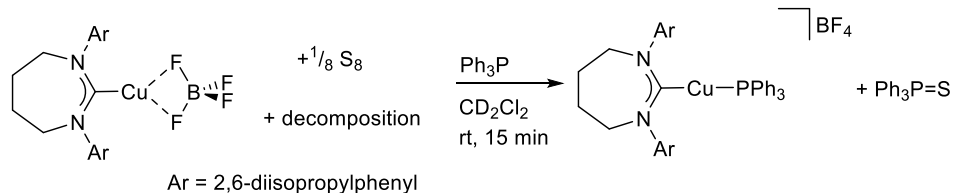

Triphenylphosphine (0.026 g, 0.100 mmol) was then added, and the solution was reanalyzed by NMR spectroscopy.

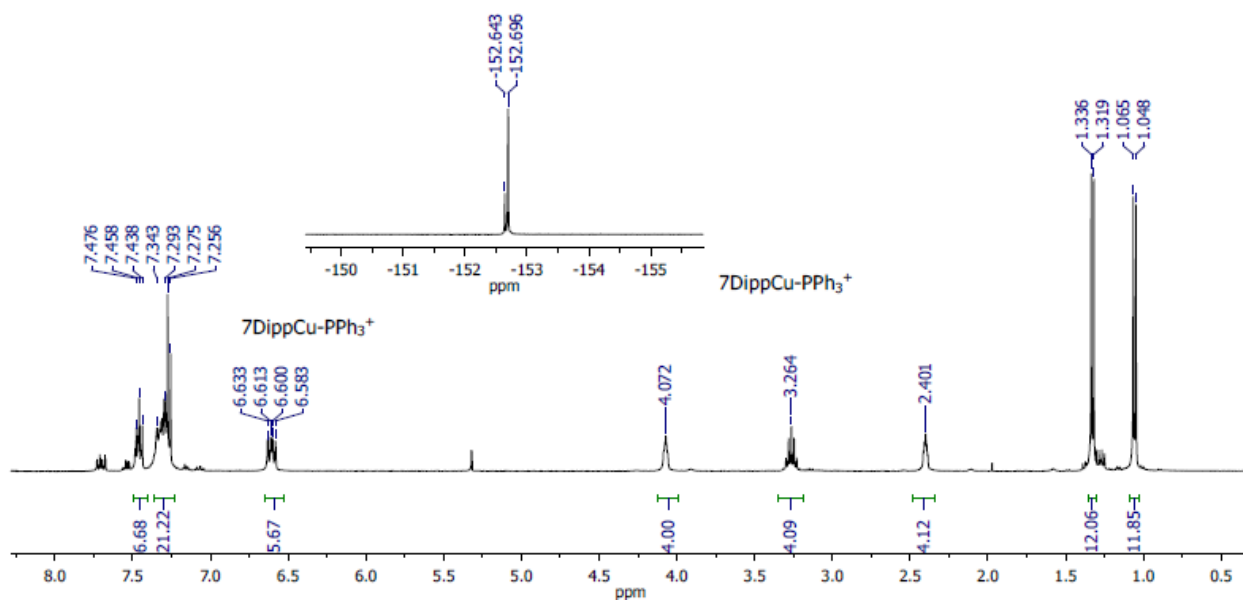

**Figure S21.** <sup>1</sup>H spectrum following addition of PPh<sub>3</sub> with the <sup>19</sup>F NMR spectrum overlaid in CD<sub>2</sub>Cl<sub>2</sub>.

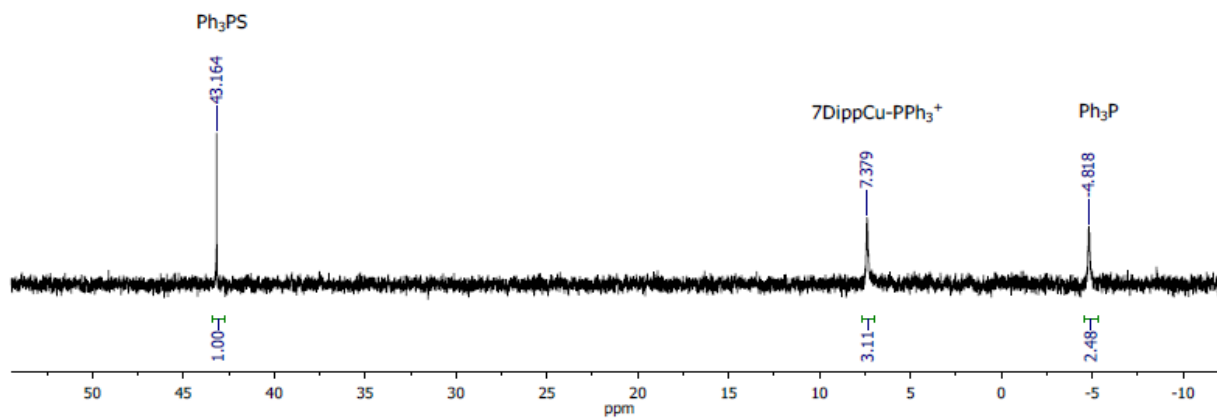

**Figure S22.** <sup>31</sup>P spectrum following addition of PPh<sub>3</sub> in CD<sub>2</sub>Cl<sub>2</sub>.



## Nitrosonium Reactivity of **4**

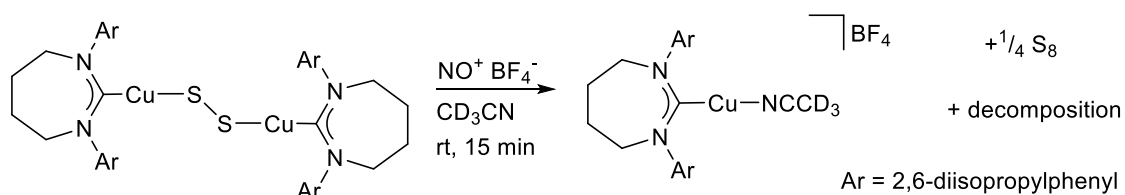

$\text{NO}^+\text{BF}_4^-$  (0.004 g, 0.034 mmol) was added to a solution of  $(7\text{DippCuS})_2$  (0.035 g, 0.034 mmol) in  $\text{CD}_3\text{CN}$  (1 mL) at room temperature. The mixture was allowed to stir for 15 min before the  $^1\text{H}$  NMR spectrum was recorded.

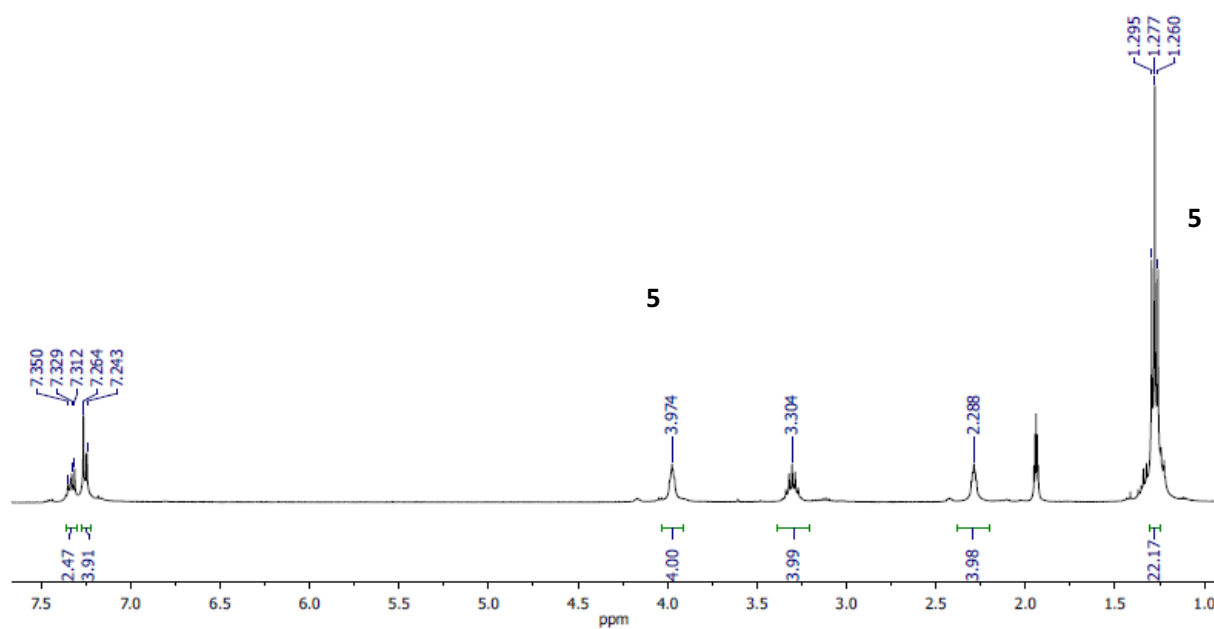

**Figure S23.**  $^1\text{H}$  NMR spectrum following addition of  $\text{NO}^+\text{BF}_4^-$  to **4**, resulting in **5** in  $\text{CD}_3\text{CN}$ .

# Nitrosonium Reactivity of **4** (cont'd)

Triphenylphosphine (0.026 g, 0.099 mmol) was added and the  $^1\text{H}$  and  $^{31}\text{P}$  NMR spectra were recorded after 15 min.

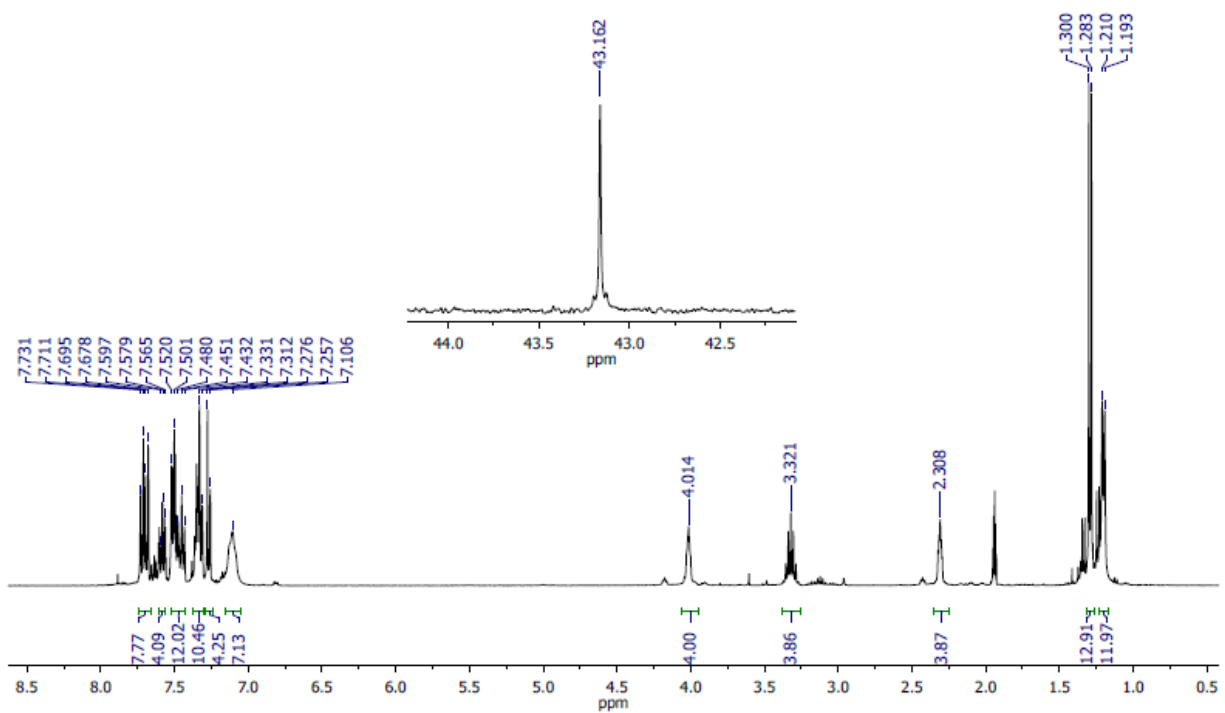

**Figure S24.**  $^1\text{H}$  and  $^{31}\text{P}$  NMR spectra following addition of  $\text{Ph}_3\text{P}$ , resulting in  $\text{Ph}_3\text{P}=\text{S}$  in  $\text{CD}_3\text{CN}$ .

## Generation of 7DippCuBF<sub>4</sub>

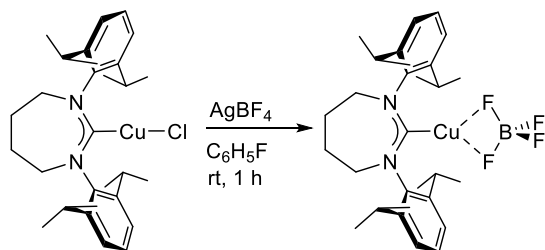

**7DippCuBF<sub>4</sub>** 7DippCuCl (0.092 g, 0.18 mmol) and silver tetrafluoroborate (0.035 g, 0.18 mmol) were combined in a 20-mL vial, equipped with a stirbar, before C<sub>6</sub>H<sub>5</sub>F (5 mL) was added. The mixture was allowed to stir for 1h, filtered through Celite, and concentrated *in vacuo* to afford the product as a colorless solid (0.090 g, 89%). <sup>1</sup>H NMR (400 MHz, CD<sub>2</sub>Cl<sub>2</sub>): δ (ppm) 7.43 (t, <sup>3</sup>J<sub>HH</sub> = 7.6 Hz, 2H, *para*-CH), 7.25 (d, <sup>3</sup>J<sub>HH</sub> = 7.6 Hz, 4H, *meta*-CH), 4.00 (m, 4H, NCH<sub>2</sub>), 3.21 (sept, <sup>3</sup>J<sub>HH</sub> = 6.8 Hz, 4H, CH(CH<sub>3</sub>)<sub>2</sub>), 2.35 (m, 4H, NCH<sub>2</sub>CH<sub>2</sub>), 1.33 (d, <sup>3</sup>J<sub>HH</sub> = 6.8 Hz, 12H, CH<sub>2</sub>(CH<sub>3</sub>)<sub>2</sub>), 1.29 (d, <sup>3</sup>J<sub>HH</sub> = 6.8 Hz, 12H, CH<sub>2</sub>(CH<sub>3</sub>)<sub>2</sub>). <sup>13</sup>C {<sup>1</sup>H} NMR (176 MHz CD<sub>2</sub>Cl<sub>2</sub>): δ (ppm) 145.4 (*ortho*-C), 144.3 (*ipso*-C), 129.6 (*para*-C), 125.4 (*meta*-C), 54.4 (NCH<sub>2</sub>), 29.2 (CH(CH<sub>3</sub>)<sub>2</sub>), 25.5 (NCH<sub>2</sub>CH<sub>2</sub>), 24.8 (CH(CH<sub>3</sub>)<sub>2</sub>). <sup>11</sup>B NMR (128 MHz, CD<sub>2</sub>Cl<sub>2</sub>): δ (ppm) -1.8 (br s, 1B, BF<sub>4</sub><sup>-</sup>). <sup>19</sup>F NMR (378 MHz, CD<sub>2</sub>Cl<sub>2</sub>): δ (ppm) -161.9 (br s, 4F, BF<sub>4</sub><sup>-</sup>).

**Note:** The carbene-*C* resonance could not be resolved despite prolonged acquisition time. We suggest the signal is broadened by coupling to the BF<sub>4</sub><sup>-</sup>. The complex is extremely air- and moisture-sensitive. A small amount of HOBf<sub>3</sub><sup>-</sup> (1:1:1:1 quartet, under 5%)<sup>3</sup> is typically observed in the <sup>19</sup>F NMR spectrum (see below) but continues to grow in over time. In the solid-state, decomposition is observed within 24h at room temperature while under an inert atmosphere.

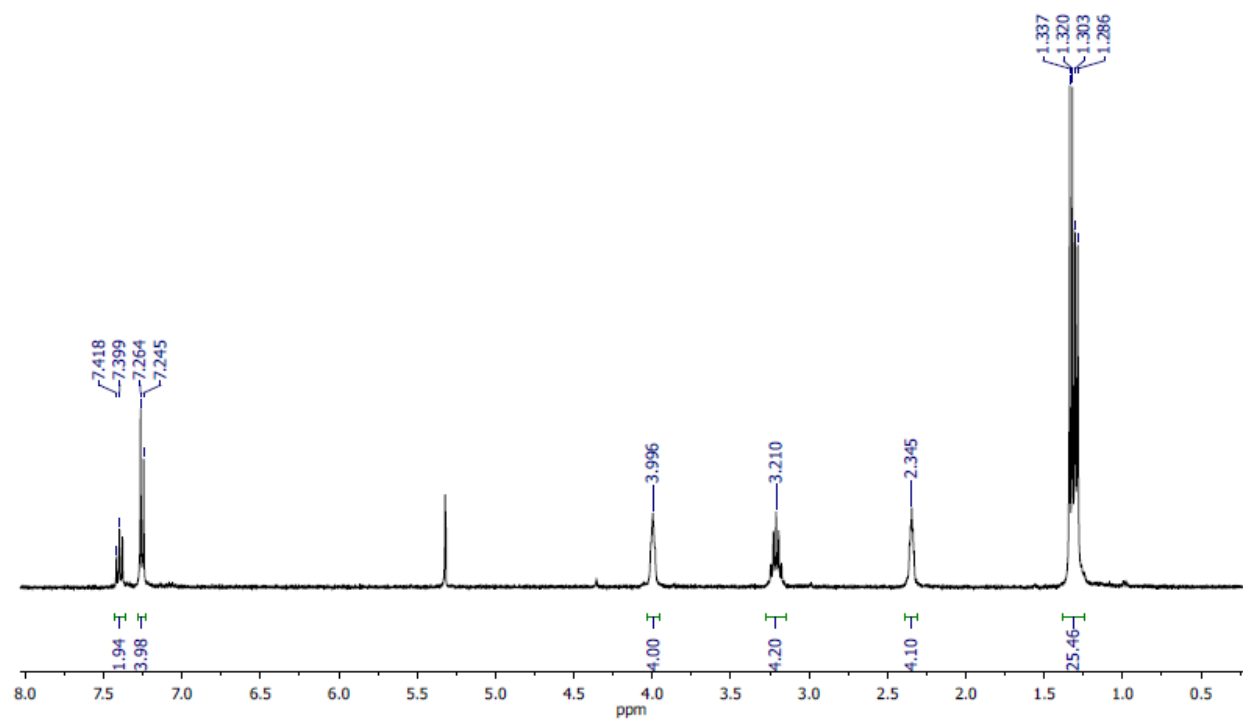

**Figure S25.** <sup>1</sup>H NMR spectrum of 7DippCuBF<sub>4</sub> in CD<sub>2</sub>Cl<sub>2</sub>.

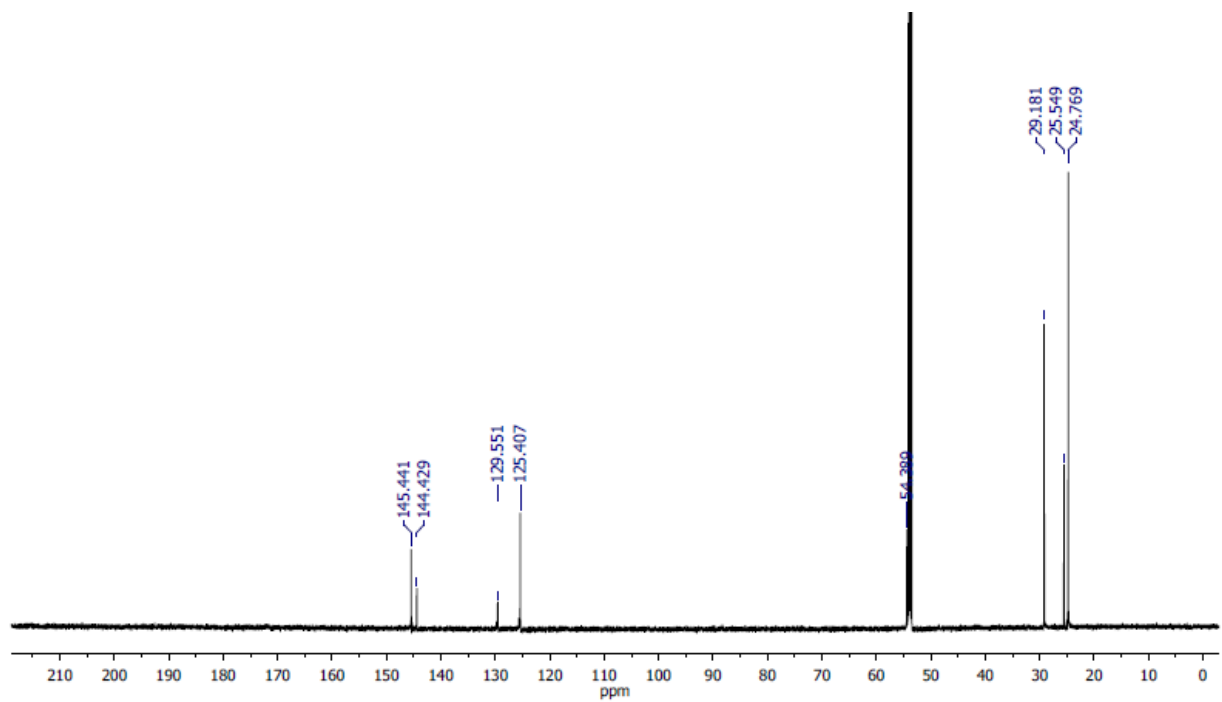

**Figure S26.** <sup>13</sup>C NMR spectrum of 7DippCuBF<sub>4</sub> in CD<sub>2</sub>Cl<sub>2</sub>.

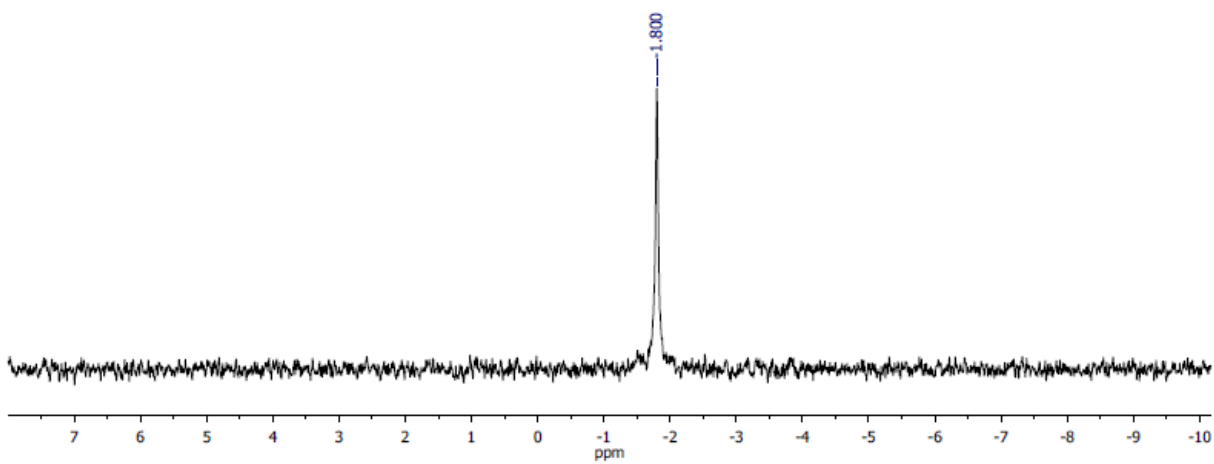

**Figure S27.**  $^{11}\text{B}$  NMR spectrum of 7DippCuBF<sub>4</sub> in CD<sub>2</sub>Cl<sub>2</sub>.

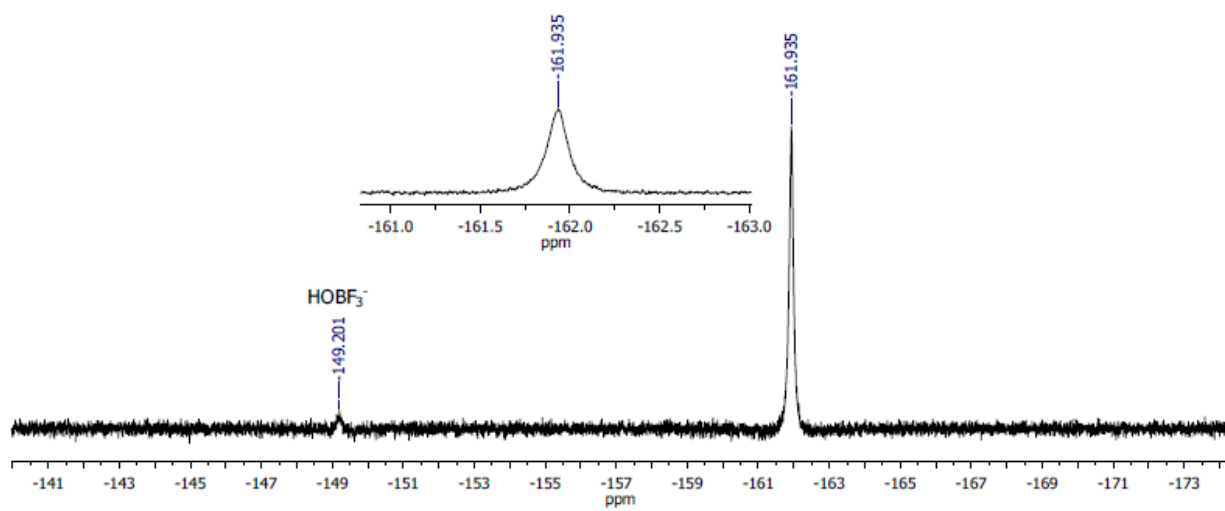

**Figure S28.**  $^{19}\text{F}$  NMR spectrum of 7DippCuBF<sub>4</sub> in CD<sub>2</sub>Cl<sub>2</sub>.

## Nitrosonium Reactivity of (7DippCuH)<sub>2</sub>

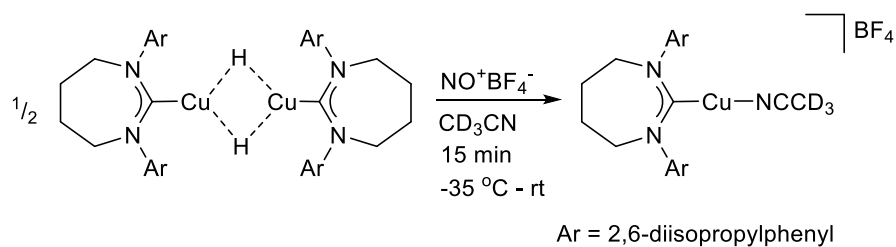

(7DippCuH)<sub>2</sub> (0.015 g, 0.016 mmol) and NO<sup>+</sup>BF<sub>4</sub><sup>−</sup> (0.04 g, 0.034 mmol) were dissolved in CD<sub>3</sub>CN (0.75 mL) at −35 °C and mixed for 15 min, then allowed to warm to room temperature, before the <sup>1</sup>H NMR spectrum was recorded.

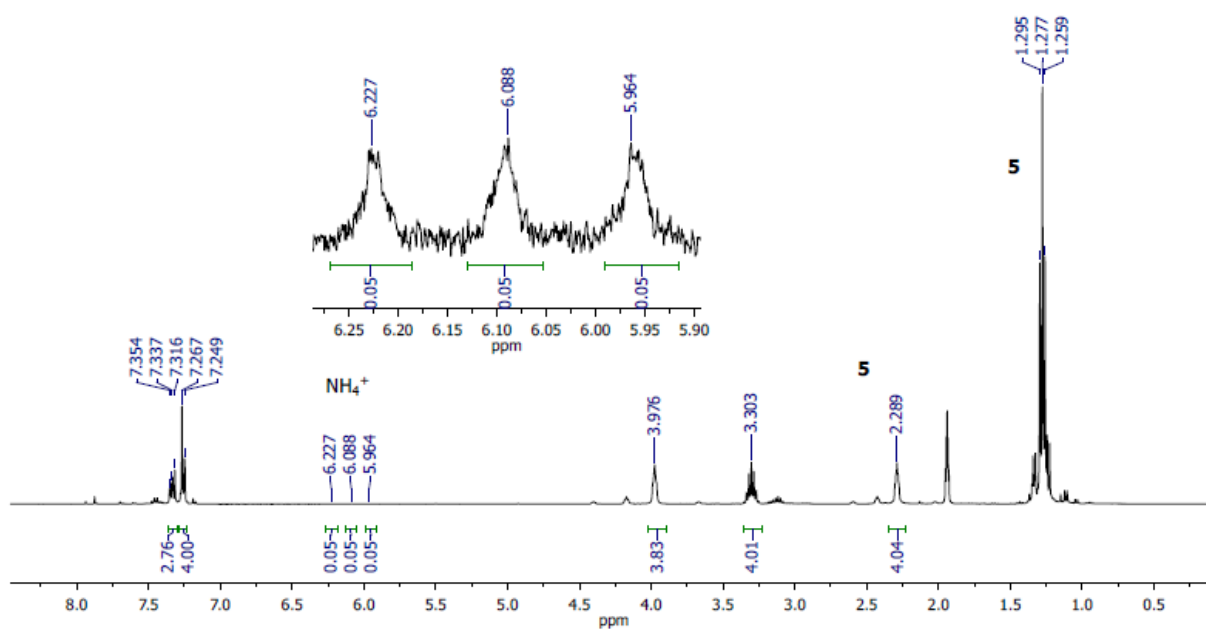

**Figure S29.** <sup>1</sup>H NMR spectrum following addition of NO<sup>+</sup>BF<sub>4</sub><sup>−</sup> to (7DippCuH)<sub>2</sub>.

## X-ray Diffraction Studies.

### Compound **1**

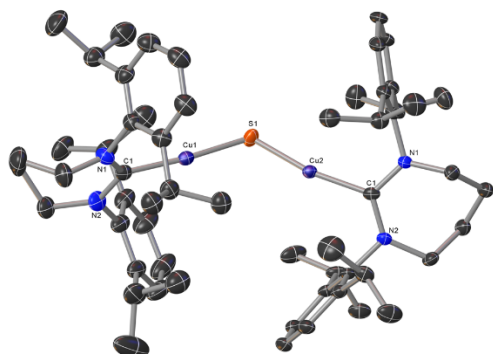

**Experimental** Single crystals of  $C_{188}H_{273}Cu_6N_{19}S_3$  **1** were obtained from acetonitrile. A suitable crystal was selected, and the crystal was mounted on a loop with paratone oil on a Bruker D8 Venture diffractometer. The crystal was kept at 100(2) K during data collection. Using Olex2,<sup>4</sup> the structure was solved with the ShelXT<sup>5</sup> structure solution program using Intrinsic Phasing and refined with the ShelXL<sup>6</sup> refinement package using Least Squares minimization.

**Crystal Data** for  $C_{188}H_{273}Cu_6N_{19}S_3$  ( $M = 3276.75$  g/mol): monoclinic, space group P2/n (no. 13),  $a = 24.8277(13)$  Å,  $b = 12.3758(7)$  Å,  $c = 62.737(3)$  Å,  $\beta = 97.108(3)^\circ$ ,  $V = 19128.6(17)$  Å<sup>3</sup>,  $Z = 4$ ,  $T = 100(2)$  K,  $\mu(\text{CuK}\alpha) = 1.424$  mm<sup>-1</sup>,  $D_{\text{calc}} = 1.138$  g/cm<sup>3</sup>, 142144 reflections measured ( $5.218^\circ \leq 2\theta \leq 130.166^\circ$ ), 32605 unique ( $R_{\text{int}} = 0.0744$ ,  $R_{\text{sigma}} = 0.0549$ ) which were used in all calculations. The final  $R_1$  was 0.0655 ( $I > 2\sigma(I)$ ) and  $wR_2$  was 0.1751 (all data).

**Table S1 Crystal data and structure refinement for 1.**

|                                             |                                                                                  |
|---------------------------------------------|----------------------------------------------------------------------------------|
| Identification code                         | Cu2S_L                                                                           |
| Empirical formula                           | C <sub>188</sub> H <sub>273</sub> Cu <sub>6</sub> N <sub>19</sub> S <sub>3</sub> |
| Formula weight                              | 3276.75                                                                          |
| Temperature/K                               | 100(2)                                                                           |
| Crystal system                              | monoclinic                                                                       |
| Space group                                 | P2/n                                                                             |
| a/Å                                         | 24.8277(13)                                                                      |
| b/Å                                         | 12.3758(7)                                                                       |
| c/Å                                         | 62.737(3)                                                                        |
| α/°                                         | 90                                                                               |
| β/°                                         | 97.108(3)                                                                        |
| γ/°                                         | 90                                                                               |
| Volume/Å <sup>3</sup>                       | 19128.6(17)                                                                      |
| Z                                           | 4                                                                                |
| ρ <sub>calc</sub> /cm <sup>3</sup>          | 1.138                                                                            |
| μ/mm <sup>-1</sup>                          | 1.424                                                                            |
| F(000)                                      | 7023.0                                                                           |
| Crystal size/mm <sup>3</sup>                | 0.257 × 0.228 × 0.146                                                            |
| Radiation                                   | CuKα (λ = 1.54178)                                                               |
| 2θ range for data collection/°              | 5.218 to 130.166                                                                 |
| Index ranges                                | -26 ≤ h ≤ 29, -14 ≤ k ≤ 14, -73 ≤ l ≤ 73                                         |
| Reflections collected                       | 142144                                                                           |
| Independent reflections                     | 32605 [R <sub>int</sub> = 0.0744, R <sub>sigma</sub> = 0.0549]                   |
| Data/restraints/parameters                  | 32605/2766/2000                                                                  |
| Goodness-of-fit on F <sup>2</sup>           | 1.027                                                                            |
| Final R indexes [I ≥ 2σ (I)]                | R <sub>1</sub> = 0.0655, wR <sub>2</sub> = 0.1647                                |
| Final R indexes [all data]                  | R <sub>1</sub> = 0.0828, wR <sub>2</sub> = 0.1751                                |
| Largest diff. peak/hole / e Å <sup>-3</sup> | 2.72/-1.27                                                                       |

**Table S2 Bond Lengths (Å) for 1**

| Atom | Atom  | Length/Å   | Atom   | Atom   | Length/Å |
|------|-------|------------|--------|--------|----------|
| Cu1  | Cu2   | 3.5816(7)  | C27_10 | C29_10 | 1.530(3) |
| Cu1  | S1    | 2.1115(11) | N1_11  | C1_11  | 1.345(2) |
| Cu1  | C1_8  | 1.912(3)   | N1_11  | C2_11  | 1.479(2) |
| Cu2  | S1    | 2.1236(10) | N1_11  | C6_11  | 1.453(2) |
| Cu2  | C1_9  | 1.916(2)   | N2_11  | C1_11  | 1.347(2) |
| Cu3  | Cu4   | 3.4751(7)  | N2_11  | C5_11  | 1.484(2) |
| Cu3  | S2    | 2.1171(10) | N2_11  | C18_11 | 1.451(2) |
| Cu3  | C1_10 | 1.909(2)   | C2_11  | C3_11  | 1.513(3) |
| Cu4  | S2    | 2.1081(11) | C3_11  | C4_11  | 1.531(3) |



|       |                  |            |        |        |          |
|-------|------------------|------------|--------|--------|----------|
| Cu4   | C1_11            | 1.892(3)   | C4_11  | C5_11  | 1.520(3) |
| Cu5   | Cu5 <sup>1</sup> | 3.5959(10) | C6_11  | C7_11  | 1.398(3) |
| Cu5   | S3               | 2.1128(10) | C6_11  | C11_11 | 1.404(2) |
| Cu5   | C1_13            | 1.900(2)   | C7_11  | C8_11  | 1.393(3) |
| Cu6   | Cu6 <sup>2</sup> | 3.6774(11) | C7_11  | C12_11 | 1.522(3) |
| Cu6   | S4               | 2.1159(10) | C8_11  | C9_11  | 1.394(3) |
| Cu6   | C1_12            | 1.904(2)   | C9_11  | C10_11 | 1.374(3) |
| N1_8  | C1_8             | 1.344(2)   | C10_11 | C11_11 | 1.393(3) |
| N1_8  | C2_8             | 1.479(2)   | C11_11 | C15_11 | 1.519(3) |
| N1_8  | C6_8             | 1.454(2)   | C12_11 | C13_11 | 1.532(3) |
| N2_8  | C1_8             | 1.350(2)   | C12_11 | C14_11 | 1.530(3) |
| N2_8  | C5_8             | 1.485(2)   | C15_11 | C16_11 | 1.526(3) |
| N2_8  | C18_8            | 1.451(2)   | C15_11 | C17_11 | 1.542(3) |
| C2_8  | C3_8             | 1.512(3)   | C18_11 | C19_11 | 1.398(2) |
| C3_8  | C4_8             | 1.531(3)   | C18_11 | C23_11 | 1.401(2) |
| C4_8  | C5_8             | 1.519(3)   | C19_11 | C20_11 | 1.401(3) |
| C6_8  | C7_8             | 1.398(3)   | C19_11 | C24_11 | 1.516(2) |
| C6_8  | C11_8            | 1.404(2)   | C20_11 | C21_11 | 1.384(3) |
| C7_8  | C8_8             | 1.394(3)   | C21_11 | C22_11 | 1.385(3) |
| C7_8  | C12_8            | 1.521(3)   | C22_11 | C23_11 | 1.395(3) |
| C8_8  | C9_8             | 1.393(3)   | C23_11 | C27_11 | 1.527(3) |
| C9_8  | C10_8            | 1.374(3)   | C24_11 | C25_11 | 1.528(3) |
| C10_8 | C11_8            | 1.393(3)   | C24_11 | C26_11 | 1.534(3) |
| C11_8 | C15_8            | 1.519(3)   | C27_11 | C28_11 | 1.527(3) |
| C12_8 | C13_8            | 1.532(3)   | C27_11 | C29_11 | 1.528(3) |
| C12_8 | C14_8            | 1.530(3)   | N1_12  | C1_12  | 1.344(2) |
| C15_8 | C16_8            | 1.527(3)   | N1_12  | C2_12  | 1.476(2) |
| C15_8 | C17_8            | 1.541(3)   | N1_12  | C6_12  | 1.456(2) |
| C18_8 | C19_8            | 1.398(3)   | N2_12  | C1_12  | 1.348(2) |
| C18_8 | C23_8            | 1.400(2)   | N2_12  | C5_12  | 1.486(2) |
| C19_8 | C20_8            | 1.401(3)   | N2_12  | C18_12 | 1.448(2) |
| C19_8 | C24_8            | 1.518(2)   | C2_12  | C3_12  | 1.511(3) |
| C20_8 | C21_8            | 1.383(3)   | C3_12  | C4_12  | 1.532(3) |
| C21_8 | C22_8            | 1.385(3)   | C4_12  | C5_12  | 1.520(3) |
| C22_8 | C23_8            | 1.395(3)   | C6_12  | C7_12  | 1.397(3) |
| C23_8 | C27_8            | 1.527(3)   | C6_12  | C11_12 | 1.403(2) |
| C24_8 | C25_8            | 1.529(3)   | C7_12  | C8_12  | 1.393(3) |
| C24_8 | C26_8            | 1.534(3)   | C7_12  | C12_12 | 1.520(3) |
| C27_8 | C28_8            | 1.530(3)   | C8_12  | C9_12  | 1.393(3) |
| C27_8 | C29_8            | 1.531(3)   | C9_12  | C10_12 | 1.373(3) |
| N1_9  | C1_9             | 1.346(2)   | C10_12 | C11_12 | 1.393(3) |
| N1_9  | C2_9             | 1.481(2)   | C11_12 | C15_12 | 1.518(3) |
| N1_9  | C6_9             | 1.454(2)   | C12_12 | C13_12 | 1.531(3) |
| N2_9  | C1_9             | 1.349(2)   | C12_12 | C14_12 | 1.529(3) |
| N2_9  | C5_9             | 1.484(2)   | C15_12 | C16_12 | 1.527(3) |
| N2_9  | C18_9            | 1.452(2)   | C15_12 | C17_12 | 1.543(3) |
| C2_9  | C3_9             | 1.514(3)   | C18_12 | C19_12 | 1.400(3) |
| C3_9  | C4_9             | 1.532(3)   | C18_12 | C23_12 | 1.400(2) |
| C4_9  | C5_9             | 1.518(3)   | C19_12 | C20_12 | 1.401(3) |

|        |        |          |               |          |
|--------|--------|----------|---------------|----------|
| C6_9   | C7_9   | 1.399(3) | C19_12 C24_12 | 1.517(3) |
| C6_9   | C11_9  | 1.403(2) | C20_12 C21_12 | 1.383(3) |
| C7_9   | C8_9   | 1.393(2) | C21_12 C22_12 | 1.385(3) |
| C7_9   | C12_9  | 1.521(3) | C22_12 C23_12 | 1.396(3) |
| C8_9   | C9_9   | 1.393(3) | C23_12 C27_12 | 1.527(3) |
| C9_9   | C10_9  | 1.374(3) | C24_12 C25_12 | 1.529(3) |
| C10_9  | C11_9  | 1.393(3) | C24_12 C26_12 | 1.534(3) |
| C11_9  | C15_9  | 1.519(3) | C27_12 C28_12 | 1.529(3) |
| C12_9  | C13_9  | 1.531(3) | C27_12 C29_12 | 1.532(3) |
| C12_9  | C14_9  | 1.530(3) | N1_13 C1_13   | 1.344(2) |
| C15_9  | C16_9  | 1.527(3) | N1_13 C2_13   | 1.479(2) |
| C15_9  | C17_9  | 1.543(3) | N1_13 C6_13   | 1.453(2) |
| C18_9  | C19_9  | 1.398(2) | N2_13 C1_13   | 1.349(2) |
| C18_9  | C23_9  | 1.401(2) | N2_13 C5_13   | 1.484(2) |
| C19_9  | C20_9  | 1.402(3) | N2_13 C18_13  | 1.450(2) |
| C19_9  | C24_9  | 1.517(2) | C2_13 C3_13   | 1.512(3) |
| C20_9  | C21_9  | 1.383(3) | C3_13 C4_13   | 1.531(3) |
| C21_9  | C22_9  | 1.385(3) | C4_13 C5_13   | 1.518(3) |
| C22_9  | C23_9  | 1.394(3) | C6_13 C7_13   | 1.399(3) |
| C23_9  | C27_9  | 1.525(3) | C6_13 C11_13  | 1.404(2) |
| C24_9  | C25_9  | 1.530(3) | C7_13 C8_13   | 1.394(3) |
| C24_9  | C26_9  | 1.535(3) | C7_13 C12_13  | 1.520(3) |
| C27_9  | C28_9  | 1.528(3) | C8_13 C9_13   | 1.393(3) |
| C27_9  | C29_9  | 1.530(3) | C9_13 C10_13  | 1.374(3) |
| N1_10  | C1_10  | 1.346(2) | C10_13 C11_13 | 1.393(3) |
| N1_10  | C2_10  | 1.481(2) | C11_13 C15_13 | 1.520(3) |
| N1_10  | C6_10  | 1.453(2) | C12_13 C13_13 | 1.533(3) |
| N2_10  | C1_10  | 1.349(2) | C12_13 C14_13 | 1.531(3) |
| N2_10  | C5_10  | 1.485(2) | C15_13 C16_13 | 1.527(3) |
| N2_10  | C18_10 | 1.451(2) | C15_13 C17_13 | 1.543(3) |
| C2_10  | C3_10  | 1.512(3) | C18_13 C19_13 | 1.397(3) |
| C3_10  | C4_10  | 1.533(3) | C18_13 C23_13 | 1.401(2) |
| C4_10  | C5_10  | 1.519(3) | C19_13 C20_13 | 1.402(3) |
| C6_10  | C7_10  | 1.398(3) | C19_13 C24_13 | 1.517(3) |
| C6_10  | C11_10 | 1.403(2) | C20_13 C21_13 | 1.383(3) |
| C7_10  | C8_10  | 1.393(3) | C21_13 C22_13 | 1.385(3) |
| C7_10  | C12_10 | 1.521(3) | C22_13 C23_13 | 1.395(3) |
| C8_10  | C9_10  | 1.394(3) | C23_13 C27_13 | 1.526(3) |
| C9_10  | C10_10 | 1.374(3) | C24_13 C25_13 | 1.529(3) |
| C10_10 | C11_10 | 1.393(3) | C24_13 C26_13 | 1.536(3) |
| C11_10 | C15_10 | 1.519(3) | C27_13 C28_13 | 1.529(3) |
| C12_10 | C13_10 | 1.532(3) | C27_13 C29_13 | 1.530(3) |
| C12_10 | C14_10 | 1.529(3) | N1S_2 C2S_2   | 1.128(3) |
| C15_10 | C16_10 | 1.527(3) | C2S_2 C3S_2   | 1.440(3) |
| C15_10 | C17_10 | 1.542(3) | N1S_3 C2S_3   | 1.128(3) |
| C18_10 | C19_10 | 1.398(2) | C2S_3 C3S_3   | 1.441(3) |
| C18_10 | C23_10 | 1.399(2) | N1S_4 C2S_4   | 1.128(3) |
| C19_10 | C20_10 | 1.401(3) | C2S_4 C3S_4   | 1.440(3) |
| C19_10 | C24_10 | 1.517(2) | N1S_5 C2S_5   | 1.128(3) |

|               |          |             |          |
|---------------|----------|-------------|----------|
| C20_10 C21_10 | 1.383(3) | C2S_5 C3S_5 | 1.440(3) |
| C21_10 C22_10 | 1.385(3) | N1S_6 C2S_6 | 1.129(3) |
| C22_10 C23_10 | 1.396(3) | C2S_6 C3S_6 | 1.439(3) |
| C23_10 C27_10 | 1.526(3) | N1S_7 C2S_7 | 1.128(3) |
| C24_10 C25_10 | 1.529(3) | C2S_7 C3S_7 | 1.441(3) |
| C24_10 C26_10 | 1.536(3) | N1S_1 C2S_1 | 1.129(3) |
| C27_10 C28_10 | 1.528(3) | C2S_1 C3S_1 | 1.441(3) |

**Table S3** Bond Angles (deg) for **1**

| Atom             | Atom | Atom             | Angle/°    | Atom   | Atom   | Atom   | Angle/°    |
|------------------|------|------------------|------------|--------|--------|--------|------------|
| S1               | Cu1  | Cu2              | 32.36(3)   | C22_10 | C23_10 | C27_10 | 119.62(19) |
| C1_8             | Cu1  | Cu2              | 154.64(10) | C19_10 | C24_10 | C25_10 | 111.8(2)   |
| C1_8             | Cu1  | S1               | 172.83(10) | C19_10 | C24_10 | C26_10 | 110.98(19) |
| S1               | Cu2  | Cu1              | 32.15(3)   | C25_10 | C24_10 | C26_10 | 109.8(2)   |
| C1_9             | Cu2  | Cu1              | 163.25(8)  | C23_10 | C27_10 | C28_10 | 110.7(2)   |
| C1_9             | Cu2  | S1               | 164.29(9)  | C23_10 | C27_10 | C29_10 | 111.8(2)   |
| S2               | Cu3  | Cu4              | 34.58(3)   | C28_10 | C27_10 | C29_10 | 110.9(2)   |
| C1_10            | Cu3  | Cu4              | 161.23(8)  | C1_11  | N1_11  | C2_11  | 125.3(2)   |
| C1_10            | Cu3  | S2               | 163.95(9)  | C1_11  | N1_11  | C6_11  | 117.61(19) |
| S2               | Cu4  | Cu3              | 34.75(3)   | C6_11  | N1_11  | C2_11  | 115.60(19) |
| C1_11            | Cu4  | Cu3              | 156.32(9)  | C1_11  | N2_11  | C5_11  | 129.56(19) |
| C1_11            | Cu4  | S2               | 168.61(10) | C1_11  | N2_11  | C18_11 | 117.00(19) |
| S3               | Cu5  | Cu5 <sup>1</sup> | 31.68(4)   | C18_11 | N2_11  | C5_11  | 113.40(18) |
| C1_13            | Cu5  | Cu5 <sup>1</sup> | 160.01(9)  | N1_11  | C1_11  | Cu4    | 119.86(16) |
| C1_13            | Cu5  | S3               | 168.27(10) | N1_11  | C1_11  | N2_11  | 118.3(2)   |
| S4               | Cu6  | Cu6 <sup>2</sup> | 29.66(4)   | N2_11  | C1_11  | Cu4    | 121.62(17) |
| C1_12            | Cu6  | Cu6 <sup>2</sup> | 161.01(9)  | N1_11  | C2_11  | C3_11  | 113.5(2)   |
| C1_12            | Cu6  | S4               | 168.98(11) | C2_11  | C3_11  | C4_11  | 111.4(2)   |
| Cu1              | S1   | Cu2              | 115.49(4)  | C5_11  | C4_11  | C3_11  | 112.1(2)   |
| Cu4              | S2   | Cu3              | 110.67(4)  | N2_11  | C5_11  | C4_11  | 113.7(2)   |
| Cu5 <sup>1</sup> | S3   | Cu5              | 116.63(8)  | C7_11  | C6_11  | N1_11  | 118.69(18) |
| Cu6              | S4   | Cu6 <sup>2</sup> | 120.68(8)  | C7_11  | C6_11  | C11_11 | 122.30(18) |
| C1_8             | N1_8 | C2_8             | 125.7(2)   | C11_11 | C6_11  | N1_11  | 118.99(19) |
| C1_8             | N1_8 | C6_8             | 118.22(19) | C6_11  | C7_11  | C12_11 | 122.82(19) |
| C6_8             | N1_8 | C2_8             | 115.26(19) | C8_11  | C7_11  | C6_11  | 117.73(19) |
| C1_8             | N2_8 | C5_8             | 129.18(19) | C8_11  | C7_11  | C12_11 | 119.4(2)   |
| C1_8             | N2_8 | C18_8            | 116.62(19) | C7_11  | C8_11  | C9_11  | 120.8(2)   |
| C18_8            | N2_8 | C5_8             | 113.46(19) | C10_11 | C9_11  | C8_11  | 120.2(2)   |
| N1_8             | C1_8 | Cu1              | 122.19(16) | C9_11  | C10_11 | C11_11 | 121.2(2)   |
| N1_8             | C1_8 | N2_8             | 117.8(2)   | C6_11  | C11_11 | C15_11 | 122.2(2)   |
| N2_8             | C1_8 | Cu1              | 120.01(16) | C10_11 | C11_11 | C6_11  | 117.7(2)   |
| N1_8             | C2_8 | C3_8             | 114.1(2)   | C10_11 | C11_11 | C15_11 | 120.0(2)   |
| C2_8             | C3_8 | C4_8             | 111.2(2)   | C7_11  | C12_11 | C13_11 | 112.0(2)   |
| C5_8             | C4_8 | C3_8             | 112.2(2)   | C7_11  | C12_11 | C14_11 | 110.3(2)   |
| N2_8             | C5_8 | C4_8             | 114.6(2)   | C14_11 | C12_11 | C13_11 | 110.5(2)   |
| C7_8             | C6_8 | N1_8             | 118.47(18) | C11_11 | C15_11 | C16_11 | 111.8(2)   |
| C7_8             | C6_8 | C11_8            | 122.28(18) | C11_11 | C15_11 | C17_11 | 110.9(2)   |
| C11_8            | C6_8 | N1_8             | 119.22(19) | C16_11 | C15_11 | C17_11 | 110.9(2)   |

|       |       |       |            |        |        |        |            |
|-------|-------|-------|------------|--------|--------|--------|------------|
| C6_8  | C7_8  | C12_8 | 122.29(19) | C19_11 | C18_11 | N2_11  | 119.24(18) |
| C8_8  | C7_8  | C6_8  | 118.07(19) | C19_11 | C18_11 | C23_11 | 122.92(18) |
| C8_8  | C7_8  | C12_8 | 119.6(2)   | C23_11 | C18_11 | N2_11  | 117.77(19) |
| C9_8  | C8_8  | C7_8  | 120.4(2)   | C18_11 | C19_11 | C20_11 | 117.20(19) |
| C10_8 | C9_8  | C8_8  | 120.3(2)   | C18_11 | C19_11 | C24_11 | 122.94(19) |
| C9_8  | C10_8 | C11_8 | 121.5(2)   | C20_11 | C19_11 | C24_11 | 119.9(2)   |
| C6_8  | C11_8 | C15_8 | 122.5(2)   | C21_11 | C20_11 | C19_11 | 120.8(2)   |
| C10_8 | C11_8 | C6_8  | 117.4(2)   | C20_11 | C21_11 | C22_11 | 120.7(2)   |
| C10_8 | C11_8 | C15_8 | 120.1(2)   | C21_11 | C22_11 | C23_11 | 120.5(2)   |
| C7_8  | C12_8 | C13_8 | 111.6(2)   | C18_11 | C23_11 | C27_11 | 121.54(19) |
| C7_8  | C12_8 | C14_8 | 110.5(2)   | C22_11 | C23_11 | C18_11 | 117.71(19) |
| C14_8 | C12_8 | C13_8 | 110.7(2)   | C22_11 | C23_11 | C27_11 | 120.47(19) |
| C11_8 | C15_8 | C16_8 | 111.5(2)   | C19_11 | C24_11 | C25_11 | 112.5(2)   |
| C11_8 | C15_8 | C17_8 | 111.4(2)   | C19_11 | C24_11 | C26_11 | 111.7(2)   |
| C16_8 | C15_8 | C17_8 | 111.0(2)   | C25_11 | C24_11 | C26_11 | 110.0(2)   |
| C19_8 | C18_8 | N2_8  | 118.62(18) | C23_11 | C27_11 | C28_11 | 110.5(2)   |
| C19_8 | C18_8 | C23_8 | 122.69(19) | C23_11 | C27_11 | C29_11 | 112.3(2)   |
| C23_8 | C18_8 | N2_8  | 118.69(19) | C28_11 | C27_11 | C29_11 | 111.1(2)   |
| C18_8 | C19_8 | C20_8 | 117.57(19) | C1_12  | N1_12  | C2_12  | 128.63(18) |
| C18_8 | C19_8 | C24_8 | 122.59(19) | C1_12  | N1_12  | C6_12  | 116.54(19) |
| C20_8 | C19_8 | C24_8 | 119.8(2)   | C6_12  | N1_12  | C2_12  | 114.64(18) |
| C21_8 | C20_8 | C19_8 | 120.6(2)   | C1_12  | N2_12  | C5_12  | 126.73(19) |
| C20_8 | C21_8 | C22_8 | 120.6(2)   | C1_12  | N2_12  | C18_12 | 118.43(19) |
| C21_8 | C22_8 | C23_8 | 120.8(2)   | C18_12 | N2_12  | C5_12  | 114.22(18) |
| C18_8 | C23_8 | C27_8 | 121.8(2)   | N1_12  | C1_12  | Cu6    | 120.95(15) |
| C22_8 | C23_8 | C18_8 | 117.7(2)   | N1_12  | C1_12  | N2_12  | 118.11(19) |
| C22_8 | C23_8 | C27_8 | 120.3(2)   | N2_12  | C1_12  | Cu6    | 120.90(16) |
| C19_8 | C24_8 | C25_8 | 111.7(2)   | N1_12  | C2_12  | C3_12  | 115.2(2)   |
| C19_8 | C24_8 | C26_8 | 111.6(2)   | C2_12  | C3_12  | C4_12  | 111.6(2)   |
| C25_8 | C24_8 | C26_8 | 110.0(2)   | C5_12  | C4_12  | C3_12  | 112.09(19) |
| C23_8 | C27_8 | C28_8 | 111.3(2)   | N2_12  | C5_12  | C4_12  | 113.6(2)   |
| C23_8 | C27_8 | C29_8 | 111.4(2)   | C7_12  | C6_12  | N1_12  | 118.05(19) |
| C28_8 | C27_8 | C29_8 | 110.0(2)   | C7_12  | C6_12  | C11_12 | 122.73(18) |
| C1_9  | N1_9  | C2_9  | 124.90(18) | C11_12 | C6_12  | N1_12  | 119.20(19) |
| C1_9  | N1_9  | C6_9  | 118.38(18) | C6_12  | C7_12  | C12_12 | 122.21(19) |
| C6_9  | N1_9  | C2_9  | 115.15(18) | C8_12  | C7_12  | C6_12  | 117.76(19) |
| C1_9  | N2_9  | C5_9  | 129.36(18) | C8_12  | C7_12  | C12_12 | 120.0(2)   |
| C1_9  | N2_9  | C18_9 | 117.35(18) | C9_12  | C8_12  | C7_12  | 120.4(2)   |
| C18_9 | N2_9  | C5_9  | 113.23(17) | C10_12 | C9_12  | C8_12  | 120.6(2)   |
| N1_9  | C1_9  | Cu2   | 118.24(14) | C9_12  | C10_12 | C11_12 | 121.3(2)   |
| N1_9  | C1_9  | N2_9  | 117.74(19) | C6_12  | C11_12 | C15_12 | 122.73(19) |
| N2_9  | C1_9  | Cu2   | 123.59(16) | C10_12 | C11_12 | C6_12  | 117.2(2)   |
| N1_9  | C2_9  | C3_9  | 113.5(2)   | C10_12 | C11_12 | C15_12 | 120.0(2)   |
| C2_9  | C3_9  | C4_9  | 110.95(19) | C7_12  | C12_12 | C13_12 | 111.7(2)   |
| C5_9  | C4_9  | C3_9  | 112.4(2)   | C7_12  | C12_12 | C14_12 | 110.4(2)   |
| N2_9  | C5_9  | C4_9  | 114.71(19) | C14_12 | C12_12 | C13_12 | 111.1(2)   |
| C7_9  | C6_9  | N1_9  | 118.22(18) | C11_12 | C15_12 | C16_12 | 111.5(2)   |
| C7_9  | C6_9  | C11_9 | 122.19(18) | C11_12 | C15_12 | C17_12 | 111.3(2)   |
| C11_9 | C6_9  | N1_9  | 119.50(18) | C16_12 | C15_12 | C17_12 | 110.5(2)   |

|        |       |        |            |        |        |        |            |
|--------|-------|--------|------------|--------|--------|--------|------------|
| C6_9   | C7_9  | C12_9  | 122.34(18) | C19_12 | C18_12 | N2_12  | 118.90(19) |
| C8_9   | C7_9  | C6_9   | 118.05(19) | C23_12 | C18_12 | N2_12  | 118.63(19) |
| C8_9   | C7_9  | C12_9  | 119.59(19) | C23_12 | C18_12 | C19_12 | 122.25(19) |
| C9_9   | C8_9  | C7_9   | 120.5(2)   | C18_12 | C19_12 | C20_12 | 117.6(2)   |
| C10_9  | C9_9  | C8_9   | 120.2(2)   | C18_12 | C19_12 | C24_12 | 122.59(19) |
| C9_9   | C10_9 | C11_9  | 121.5(2)   | C20_12 | C19_12 | C24_12 | 119.5(2)   |
| C6_9   | C11_9 | C15_9  | 122.68(18) | C21_12 | C20_12 | C19_12 | 120.9(2)   |
| C10_9  | C11_9 | C6_9   | 117.41(19) | C20_12 | C21_12 | C22_12 | 120.3(2)   |
| C10_9  | C11_9 | C15_9  | 119.89(19) | C21_12 | C22_12 | C23_12 | 120.7(2)   |
| C7_9   | C12_9 | C13_9  | 112.0(2)   | C18_12 | C23_12 | C27_12 | 122.3(2)   |
| C7_9   | C12_9 | C14_9  | 110.0(2)   | C22_12 | C23_12 | C18_12 | 118.0(2)   |
| C14_9  | C12_9 | C13_9  | 110.7(2)   | C22_12 | C23_12 | C27_12 | 119.6(2)   |
| C11_9  | C15_9 | C16_9  | 111.8(2)   | C19_12 | C24_12 | C25_12 | 111.3(2)   |
| C11_9  | C15_9 | C17_9  | 111.1(2)   | C19_12 | C24_12 | C26_12 | 111.8(2)   |
| C16_9  | C15_9 | C17_9  | 110.5(2)   | C25_12 | C24_12 | C26_12 | 110.1(2)   |
| C19_9  | C18_9 | N2_9   | 119.15(18) | C23_12 | C27_12 | C28_12 | 110.7(2)   |
| C19_9  | C18_9 | C23_9  | 122.60(18) | C23_12 | C27_12 | C29_12 | 111.5(2)   |
| C23_9  | C18_9 | N2_9   | 117.98(18) | C28_12 | C27_12 | C29_12 | 110.7(2)   |
| C18_9  | C19_9 | C20_9  | 117.46(19) | C1_13  | N1_13  | C2_13  | 125.74(19) |
| C18_9  | C19_9 | C24_9  | 123.16(19) | C1_13  | N1_13  | C6_13  | 118.13(18) |
| C20_9  | C19_9 | C24_9  | 119.37(19) | C6_13  | N1_13  | C2_13  | 115.25(18) |
| C21_9  | C20_9 | C19_9  | 120.9(2)   | C1_13  | N2_13  | C5_13  | 129.43(18) |
| C20_9  | C21_9 | C22_9  | 120.5(2)   | C1_13  | N2_13  | C18_13 | 116.95(19) |
| C21_9  | C22_9 | C23_9  | 120.8(2)   | C18_13 | N2_13  | C5_13  | 113.41(18) |
| C18_9  | C23_9 | C27_9  | 122.13(19) | N1_13  | C1_13  | Cu5    | 119.60(15) |
| C22_9  | C23_9 | C18_9  | 117.75(19) | N1_13  | C1_13  | N2_13  | 117.66(19) |
| C22_9  | C23_9 | C27_9  | 120.12(19) | N2_13  | C1_13  | Cu5    | 122.74(15) |
| C19_9  | C24_9 | C25_9  | 111.6(2)   | N1_13  | C2_13  | C3_13  | 113.7(2)   |
| C19_9  | C24_9 | C26_9  | 111.3(2)   | C2_13  | C3_13  | C4_13  | 111.06(19) |
| C25_9  | C24_9 | C26_9  | 109.8(2)   | C5_13  | C4_13  | C3_13  | 112.5(2)   |
| C23_9  | C27_9 | C28_9  | 111.0(2)   | N2_13  | C5_13  | C4_13  | 114.5(2)   |
| C23_9  | C27_9 | C29_9  | 112.2(2)   | C7_13  | C6_13  | N1_13  | 118.56(18) |
| C28_9  | C27_9 | C29_9  | 110.5(2)   | C7_13  | C6_13  | C11_13 | 122.25(18) |
| C1_10  | N1_10 | C2_10  | 124.89(18) | C11_13 | C6_13  | N1_13  | 119.04(19) |
| C1_10  | N1_10 | C6_10  | 118.17(18) | C6_13  | C7_13  | C12_13 | 122.71(19) |
| C6_10  | N1_10 | C2_10  | 115.20(18) | C8_13  | C7_13  | C6_13  | 117.91(19) |
| C1_10  | N2_10 | C5_10  | 129.37(18) | C8_13  | C7_13  | C12_13 | 119.32(19) |
| C1_10  | N2_10 | C18_10 | 117.29(18) | C9_13  | C8_13  | C7_13  | 120.6(2)   |
| C18_10 | N2_10 | C5_10  | 113.25(17) | C10_13 | C9_13  | C8_13  | 120.3(2)   |
| N1_10  | C1_10 | Cu3    | 117.79(14) | C9_13  | C10_13 | C11_13 | 121.3(2)   |
| N1_10  | C1_10 | N2_10  | 117.73(19) | C6_13  | C11_13 | C15_13 | 122.39(19) |
| N2_10  | C1_10 | Cu3    | 124.01(16) | C10_13 | C11_13 | C6_13  | 117.59(19) |
| N1_10  | C2_10 | C3_10  | 113.5(2)   | C10_13 | C11_13 | C15_13 | 119.78(19) |
| C2_10  | C3_10 | C4_10  | 110.90(19) | C7_13  | C12_13 | C13_13 | 112.0(2)   |
| C5_10  | C4_10 | C3_10  | 111.9(2)   | C7_13  | C12_13 | C14_13 | 110.2(2)   |
| N2_10  | C5_10 | C4_10  | 114.32(19) | C14_13 | C12_13 | C13_13 | 110.6(2)   |
| C7_10  | C6_10 | N1_10  | 118.57(18) | C11_13 | C15_13 | C16_13 | 112.0(2)   |
| C7_10  | C6_10 | C11_10 | 121.98(18) | C11_13 | C15_13 | C17_13 | 110.7(2)   |
| C11_10 | C6_10 | N1_10  | 119.45(19) | C16_13 | C15_13 | C17_13 | 110.8(2)   |

|        |        |        |            |        |        |        |            |
|--------|--------|--------|------------|--------|--------|--------|------------|
| C6_10  | C7_10  | C12_10 | 122.36(19) | C19_13 | C18_13 | N2_13  | 119.38(19) |
| C8_10  | C7_10  | C6_10  | 118.08(19) | C19_13 | C18_13 | C23_13 | 122.52(18) |
| C8_10  | C7_10  | C12_10 | 119.5(2)   | C23_13 | C18_13 | N2_13  | 118.03(19) |
| C7_10  | C8_10  | C9_10  | 120.6(2)   | C18_13 | C19_13 | C20_13 | 117.58(19) |
| C10_10 | C9_10  | C8_10  | 120.1(2)   | C18_13 | C19_13 | C24_13 | 123.23(19) |
| C9_10  | C10_10 | C11_10 | 121.4(2)   | C20_13 | C19_13 | C24_13 | 119.2(2)   |
| C6_10  | C11_10 | C15_10 | 122.91(19) | C21_13 | C20_13 | C19_13 | 120.7(2)   |
| C10_10 | C11_10 | C6_10  | 117.6(2)   | C20_13 | C21_13 | C22_13 | 120.7(2)   |
| C10_10 | C11_10 | C15_10 | 119.51(19) | C21_13 | C22_13 | C23_13 | 120.5(2)   |
| C7_10  | C12_10 | C13_10 | 111.6(2)   | C18_13 | C23_13 | C27_13 | 121.8(2)   |
| C7_10  | C12_10 | C14_10 | 110.3(2)   | C22_13 | C23_13 | C18_13 | 117.9(2)   |
| C14_10 | C12_10 | C13_10 | 110.9(2)   | C22_13 | C23_13 | C27_13 | 120.1(2)   |
| C11_10 | C15_10 | C16_10 | 111.7(2)   | C19_13 | C24_13 | C25_13 | 111.6(2)   |
| C11_10 | C15_10 | C17_10 | 110.9(2)   | C19_13 | C24_13 | C26_13 | 111.2(2)   |
| C16_10 | C15_10 | C17_10 | 110.4(2)   | C25_13 | C24_13 | C26_13 | 109.9(2)   |
| C19_10 | C18_10 | N2_10  | 119.04(18) | C23_13 | C27_13 | C28_13 | 110.4(2)   |
| C19_10 | C18_10 | C23_10 | 122.36(18) | C23_13 | C27_13 | C29_13 | 112.3(2)   |
| C23_10 | C18_10 | N2_10  | 118.43(18) | C28_13 | C27_13 | C29_13 | 110.7(2)   |
| C18_10 | C19_10 | C20_10 | 117.69(19) | N1S_2  | C2S_2  | C3S_2  | 177.8(6)   |
| C18_10 | C19_10 | C24_10 | 122.91(19) | N1S_3  | C2S_3  | C3S_3  | 179.3(6)   |
| C20_10 | C19_10 | C24_10 | 119.39(19) | N1S_4  | C2S_4  | C3S_4  | 178.7(6)   |
| C21_10 | C20_10 | C19_10 | 120.8(2)   | N1S_5  | C2S_5  | C3S_5  | 178.0(6)   |
| C20_10 | C21_10 | C22_10 | 120.5(2)   | N1S_6  | C2S_6  | C3S_6  | 177.4(9)   |
| C21_10 | C22_10 | C23_10 | 120.7(2)   | N1S_7  | C2S_7  | C3S_7  | 179.8(8)   |
| C18_10 | C23_10 | C27_10 | 122.36(19) | N1S_1  | C2S_1  | C3S_1  | 179.1(7)   |
| C22_10 | C23_10 | C18_10 | 118.00(19) |        |        |        |            |

## Compound 4

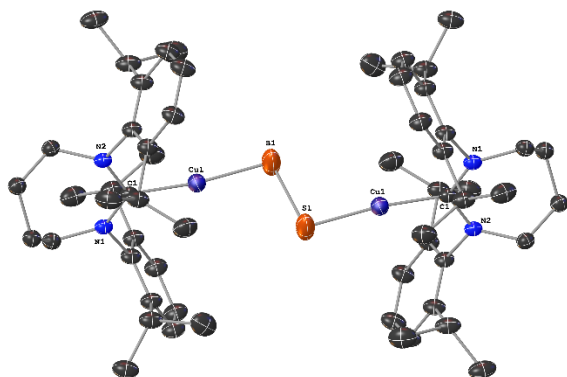

**Experimental.** Single yellow plate-shaped crystals of **4** were chosen from the sample. A suitable crystal  $0.39 \times 0.28 \times 0.13 \text{ mm}^3$  was selected and mounted on a loop with paratone oil on a Bruker D8 VENTURE diffractometer. The crystal was kept at  $T = 100(2) \text{ K}$  during data collection. The structure was solved with the ShelXT<sup>5</sup> structure solution program using the Intrinsic Phasing solution method and by using Olex2<sup>4</sup> as the graphical interface. The model was refined with version 2018/3 of ShelXL<sup>7</sup> using Least Squares minimization.

**Crystal Data.**  $\text{C}_{58}\text{H}_{84}\text{Cu}_2\text{N}_4\text{S}_2$ ,  $M_r = 1028.53$ , monoclinic,  $P2_1/n$  (No. 14),  $a = 12.3238(9) \text{ \AA}$ ,  $b = 23.592(2) \text{ \AA}$ ,  $c = 12.3896(11) \text{ \AA}$ ,  $\beta = 91.999(3)^\circ$ ,  $\alpha = \gamma = 90^\circ$ ,  $V = 3600.0(5) \text{ \AA}^3$ ,  $T = 100(2) \text{ K}$ ,  $Z = 2$ ,  $Z' = 0.5$ ,  $\mu(\text{MoK}\alpha) = 0.679 \text{ mm}^{-1}$ , 62264 reflections measured, 8228 unique ( $R_{\text{int}} = 0.0389$ ) which were used in all calculations. The final  $wR_2$  was 0.2052 (all data) and  $R_1$  was 0.0649 ( $I > 2\sigma(I)$ ).

**Table S4.** Crystal Data for **1**.

| Compound                     | <b>4</b>                                                                      |
|------------------------------|-------------------------------------------------------------------------------|
| Formula                      | C <sub>58</sub> H <sub>84</sub> Cu <sub>2</sub> N <sub>4</sub> S <sub>2</sub> |
| $D_{calc.}/\text{g cm}^{-3}$ | 0.949                                                                         |
| $\mu/\text{mm}^{-1}$         | 0.679                                                                         |
| Formula Weight               | 1028.53                                                                       |
| Colour                       | yellow                                                                        |
| Shape                        | plate                                                                         |
| Size/mm <sup>3</sup>         | 0.39×0.28×0.13                                                                |
| $T/\text{K}$                 | 100(2)                                                                        |
| Crystal System               | monoclinic                                                                    |
| Space Group                  | $P2_1/n$                                                                      |
| $a/\text{\AA}$               | 12.3238(9)                                                                    |
| $b/\text{\AA}$               | 23.592(2)                                                                     |
| $c/\text{\AA}$               | 12.3896(11)                                                                   |
| $\alpha/^\circ$              | 90                                                                            |
| $\beta/^\circ$               | 91.999(3)                                                                     |
| $\gamma/^\circ$              | 90                                                                            |
| $V/\text{\AA}^3$             | 3600.0(5)                                                                     |
| $Z$                          | 2                                                                             |
| $Z'$                         | 0.5                                                                           |
| Wavelength/ $\text{\AA}$     | 0.710730                                                                      |
| Radiation type               | MoK $\alpha$                                                                  |
| $\Theta_{min}/^\circ$        | 2.291                                                                         |
| $\Theta_{max}/^\circ$        | 27.482                                                                        |
| Measured Refl.               | 62264                                                                         |
| Independent Refl.            | 8228                                                                          |
| Reflections with $I > 2(I)$  | 7203                                                                          |
| $R_{int}$                    | 0.0389                                                                        |
| Parameters                   | 322                                                                           |
| Restraints                   | 302                                                                           |
| Largest Peak                 | 1.183                                                                         |
| Deepest Hole                 | -0.628                                                                        |
| GooF                         | 1.036                                                                         |
| $wR_2$ (all data)            | 0.2052                                                                        |
| $wR_2$                       | 0.1992                                                                        |
| $R_1$ (all data)             | 0.0704                                                                        |
| $R_1$                        | 0.0649                                                                        |

**Table S5.** Bond Length ( $\text{\AA}$ ) for **4**

| Atom  | Atom            | Length/ $\text{\AA}$ |
|-------|-----------------|----------------------|
| C2    | C3              | 1.401(3)             |
| C2    | C10             | 1.396(4)             |
| C2    | N1_1            | 1.456(3)             |
| C2    | N1_2            | 1.454(3)             |
| C3    | C4              | 1.509(4)             |
| C3    | C7              | 1.396(4)             |
| C4    | C5              | 1.527(4)             |
| C4    | C6              | 1.516(4)             |
| C7    | C8              | 1.385(4)             |
| C8    | C9              | 1.383(4)             |
| C9    | C10             | 1.407(4)             |
| C10   | C11             | 1.517(4)             |
| C11   | C12             | 1.523(4)             |
| C11   | C13             | 1.546(5)             |
| C18   | C19             | 1.409(3)             |
| C18   | C26             | 1.393(4)             |
| C18   | N2_1            | 1.454(3)             |
| C18   | N2_2            | 1.458(3)             |
| C19   | C20             | 1.521(4)             |
| C19   | C23             | 1.389(4)             |
| C20   | C21             | 1.525(4)             |
| C20   | C22             | 1.523(4)             |
| C23   | C24             | 1.384(4)             |
| C24   | C25             | 1.396(4)             |
| C25   | C26             | 1.393(4)             |
| C26   | C27             | 1.522(4)             |
| C27   | C28             | 1.529(4)             |
| C27   | C29             | 1.526(5)             |
| S1    | S1 <sup>1</sup> | 2.119(2)             |
| S1    | Cu1_1           | 2.1315(10)           |
| S1    | Cu1_2           | 2.1315(10)           |
| Cu1_1 | C1_1            | 1.899(2)             |
| N1_1  | C1_1            | 1.345(3)             |
| N1_1  | C14_1           | 1.487(3)             |
| N2_1  | C1_1            | 1.357(3)             |
| N2_1  | C17_1           | 1.475(3)             |
| C14_1 | C15_1           | 1.501(4)             |
| C15_1 | C16_1           | 1.543(4)             |
| C16_1 | C17_1           | 1.507(4)             |
| Cu1_2 | C1_2            | 1.899(2)             |
| N1_2  | C1_2            | 1.345(3)             |
| N1_2  | C14_2           | 1.487(3)             |
| N2_2  | C1_2            | 1.357(3)             |
| N2_2  | C17_2           | 1.475(3)             |
| C14_2 | C15_2           | 1.501(4)             |
| C15_2 | C16_2           | 1.543(4)             |
| C16_2 | C17_2           | 1.507(4)             |



**Table S6.** Bond Angle (deg) for **4**

| Atom | Atom | Atom | Angle/°  |
|------|------|------|----------|
| C3   | C2   | N1_1 | 122.6(3) |
| C3   | C2   | N1_2 | 116.3(3) |
| C10  | C2   | C3   | 122.0(2) |
| C10  | C2   | N1_1 | 115.3(3) |
| C10  | C2   | N1_2 | 121.6(3) |
| C2   | C3   | C4   | 122.8(2) |
| C7   | C3   | C2   | 117.9(2) |
| C7   | C3   | C4   | 119.3(2) |
| C3   | C4   | C5   | 110.5(2) |
| C3   | C4   | C6   | 111.3(3) |
| C6   | C4   | C5   | 112.1(3) |
| C8   | C7   | C3   | 121.4(3) |
| C9   | C8   | C7   | 119.8(3) |
| C8   | C9   | C10  | 121.0(3) |
| C2   | C10  | C9   | 117.9(2) |
| C2   | C10  | C11  | 122.8(2) |
| C9   | C10  | C11  | 119.3(2) |
| C10  | C11  | C12  | 111.4(2) |
| C10  | C11  | C13  | 111.1(3) |
| C12  | C11  | C13  | 109.7(3) |
| C19  | C18  | N2_1 | 114.5(3) |
| C19  | C18  | N2_2 | 120.7(2) |
| C26  | C18  | C19  | 122.0(2) |
| C26  | C18  | N2_1 | 123.4(3) |
| C26  | C18  | N2_2 | 117.3(2) |
| C18  | C19  | C20  | 122.6(2) |
| C23  | C19  | C18  | 117.7(2) |
| C23  | C19  | C20  | 119.7(2) |
| C19  | C20  | C21  | 111.1(3) |
| C19  | C20  | C22  | 110.9(2) |
| C22  | C20  | C21  | 111.0(3) |
| C24  | C23  | C19  | 121.5(3) |
| C23  | C24  | C25  | 119.8(3) |
| C26  | C25  | C24  | 120.6(3) |
| C18  | C26  | C25  | 118.4(2) |

| Atom            | Atom  | Atom  | Angle/°    |
|-----------------|-------|-------|------------|
| C18             | C26   | C27   | 122.8(2)   |
| C25             | C26   | C27   | 118.8(2)   |
| C26             | C27   | C28   | 111.7(2)   |
| C26             | C27   | C29   | 111.2(3)   |
| C29             | C27   | C28   | 111.1(3)   |
| S1 <sup>1</sup> | S1    | Cu1_1 | 99.66(6)   |
| S1 <sup>1</sup> | S1    | Cu1_2 | 99.66(6)   |
| C1_1            | Cu1_1 | S1    | 171.87(12) |
| C2              | N1_1  | C14_1 | 115.3(2)   |
| C1_1            | N1_1  | C2    | 115.6(2)   |
| C1_1            | N1_1  | C14_1 | 129.05(19) |
| C18             | N2_1  | C17_1 | 115.1(2)   |
| C1_1            | N2_1  | C18   | 116.97(18) |
| C1_1            | N2_1  | C17_1 | 127.70(19) |
| N1_1            | C1_1  | Cu1_1 | 123.14(16) |
| N1_1            | C1_1  | N2_1  | 117.8(2)   |
| N2_1            | C1_1  | Cu1_1 | 117.60(15) |
| N1_1            | C14_1 | C15_1 | 113.67(19) |
| C14_1           | C15_1 | C16_1 | 112.3(2)   |
| C17_1           | C16_1 | C15_1 | 111.9(2)   |
| N2_1            | C17_1 | C16_1 | 114.13(18) |
| C1_2            | Cu1_2 | S1    | 173.60(9)  |
| C2              | N1_2  | C14_2 | 113.21(19) |
| C1_2            | N1_2  | C2    | 117.48(19) |
| C1_2            | N1_2  | C14_2 | 129.07(19) |
| C18             | N2_2  | C17_2 | 117.1(2)   |
| C1_2            | N2_2  | C18   | 114.91(19) |
| C1_2            | N2_2  | C17_2 | 127.68(19) |
| N1_2            | C1_2  | Cu1_2 | 123.15(16) |
| N1_2            | C1_2  | N2_2  | 117.8(2)   |
| N2_2            | C1_2  | Cu1_2 | 117.60(15) |
| N1_2            | C14_2 | C15_2 | 113.68(19) |
| C14_2           | C15_2 | C16_2 | 112.3(2)   |
| C17_2           | C16_2 | C15_2 | 111.9(2)   |
| N2_2            | C17_2 | C16_2 | 114.12(18) |

## References

- (1) Jordan, A. J.; Wyss, C. M.; Bacsá, J.; Sadighi, J. P. Synthesis and Reactivity of New Copper(I) Hydride Dimers. *Organometallics* **2016**, *35*, 613-616.
- (2) Zhai, J.; Filatov, A. S.; Hillhouse, G. L.; Hopkins, M. D. Synthesis, structure, and reactions of a copper-sulfido cluster comprised of the parent Cu<sub>2</sub>S unit: {(NHC)Cu}<sub>2</sub>(μ-S). *Chem. Sci.* **2016**, *7*, 589-595.
- (3) Hartman, J. S.; Shoemaker, J. A. W.; Janzen, A. F.; Ragoona, P. J.; Szerminski, W. R. The coordination chemistry of (py)<sub>2</sub>BF<sub>2</sub><sup>+</sup> and related difluoroboron cations. *J. Fluorine Chem.* **2003**, *119*, 125-139.
- (4) Dolomanov, O.V., Bourhis, L. J., Gildea, R. J, Howard, J. A. K. & Puschmann, H. *J. Appl. Cryst.* **2009**, *42*, 339-341.
- (5) Sheldrick, G.M. *Acta Cryst.* **2015** A71, 3-8.
- (6) Sheldrick, G.M. *Acta Cryst.* **2015** C71, 3-8.
- (7) Sheldrick, G.M. *Acta Cryst.* **2015** C27, 3-8.
